# Supplementary material for: Oxidative ability of organic iodine(iii) reagents: a theoretical assessment
Source: Royal Society of Chemistry journal article supplement (doi:10.1039/d0nj00837k), 2020-01-01
Supplement: d0nj00837k1.pdf [file d0nj00837k1.pdf]

Electronic Supplementary Material (ESI) for New Journal of Chemistry.

## Supplementary Information

### Oxidative ability of organic iodine (III) reagents: a theoretical assessment

Maxim R. Radzhabov<sup>\*a</sup>, Aleksei B. Sheremetev and Tatyana S. Pivina

*N. D. Zelinsky Institute of Organic Chemistry, Russian Academy of Sciences, 119991, Moscow, Russian Federation*

All quantum chemical calculations were performed using the Gaussian 09 software package. Widely used for organic systems, B3LYP (spin-unrestricted for radical species) has been shown to be the most successful at reproducing the experimental geometric parameters, so this functional with the split-valence basis 6-31+G(d,p) for nitrogen, oxygen, hydrogen, sulfur, chlorine and fluorine atoms was used to calculate oxidative potentials, unless stated otherwise. To take relativistic effects of the iodine atom into account, the Stuttgart-Dresden fully relativistic multielectron pseudopotential SDD ECP46MDF with its adapted basis set was applied. The UltraFine integration grid was used for all DFT calculations.

The localization of the stable states of molecules on the potential energy surface (PES) was estimated by the absence of negative frequencies of the corresponding fully converged local minima (reactants and intermediates). Solvent (acetonitrile, water, dichloromethane (DCM) and acetone) effects were taken into account by performing SCRF (IEF-PCM) calculations. All Gibbs Free Energies are calculated at 298.15 K.

---

<sup>\*</sup>Corresponding Author. E-mail: mradzh2@uic.edu

<sup>a</sup>Author's present affiliation: Department of Chemistry, University of Illinois at Chicago, 845 West Taylor Street, Chicago, Illinois 60607-7061, United States

### [Bis(acetoxy)iodo]benzene

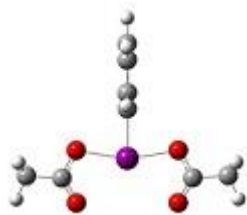

Gibbs Free Energy (hartrees):

B3LYP/6-31+G(d,p) Gas Phase = -699.848512

|   |             |             |             |
|---|-------------|-------------|-------------|
| I | 0.00014700  | -0.62657800 | 0.00000000  |
| C | -0.00033500 | 1.48175800  | 0.00000000  |
| C | -0.00049100 | 2.15908200  | -1.21786600 |
| C | -0.00082100 | 3.55692700  | -1.21095300 |
| C | -0.00098700 | 4.25423200  | 0.00000000  |
| C | -0.00082400 | 3.55692800  | 1.21095200  |
| C | -0.00049500 | 2.15908300  | 1.21786600  |
| O | 2.16892900  | -0.28356500 | 0.00000300  |
| O | -2.16878400 | -0.28454900 | -0.00000300 |
| C | 2.77988200  | -1.45238500 | 0.00000200  |
| C | -2.77921800 | -1.45364100 | -0.00000300 |
| O | 2.16341100  | -2.51831400 | 0.00000200  |
| O | -2.16227500 | -2.51929600 | -0.00000300 |
| C | 4.29208900  | -1.35955200 | -0.00000200 |
| C | -4.29146600 | -1.36147700 | 0.00000100  |
| H | -0.00124400 | 5.34020200  | -0.00000100 |
| H | -0.00094600 | 4.09594800  | -2.15366800 |
| H | -0.00036200 | 1.61711700  | -2.15734100 |
| H | -0.00036900 | 1.61711900  | 2.15734100  |
| H | -0.00095100 | 4.09594800  | 2.15366700  |
| H | -4.72012500 | -2.36401400 | -0.00001200 |
| H | -4.62831900 | -0.80898300 | 0.88223000  |
| H | -4.62832700 | -0.80895200 | -0.88220600 |
| H | 4.72119200  | -2.36190000 | -0.00000600 |
| H | 4.62869900  | -0.80689200 | -0.88222000 |
| H | 4.62870500  | -0.80689600 | 0.88221600  |

### [Bis(acetoxy)iodo]benzene

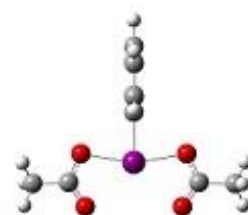

Gibbs Free Energy (hartrees):

BP86/6-31+G(d,p) Gas Phase = -699.906843

|   |             |             |             |
|---|-------------|-------------|-------------|
| I | -0.61825000 | 0.00000000  | 0.00000000  |
| C | 1.51673100  | -0.00000100 | 0.00000000  |
| C | 2.19705100  | 0.01323300  | -1.22497600 |
| C | 3.60313600  | 0.01316800  | -1.21766500 |
| C | 4.30450800  | -0.00000200 | 0.00000000  |
| C | 3.60313500  | -0.01317100 | 1.21766600  |
| C | 2.19705000  | -0.01323500 | 1.22497600  |
| O | -0.25088200 | -2.23637800 | -0.01784900 |
| O | -0.25088000 | 2.23637900  | 0.01784800  |
| C | -1.46433400 | -2.75609800 | -0.02004300 |
| C | -1.46433100 | 2.75610000  | 0.02004300  |
| O | -2.49629600 | -2.05341200 | -0.02066300 |
| O | -2.49629400 | 2.05341400  | 0.02066400  |
| C | -1.50724600 | -4.27654800 | 0.00940000  |
| C | -1.50724300 | 4.27655000  | -0.00940000 |
| H | 5.39934500  | -0.00000300 | 0.00000100  |
| H | 4.14648800  | 0.02343000  | -2.16822000 |
| H | 1.64918600  | 0.02342500  | -2.17149300 |
| H | 1.64918500  | -0.02342600 | 2.17149200  |
| H | 4.14648700  | -0.02343500 | 2.16822100  |
| H | -2.43547700 | 4.62643400  | 0.46481100  |
| H | -0.62615000 | 4.70945700  | 0.48643600  |
| H | -1.50803500 | 4.60677200  | -1.06259400 |
| H | -2.43546800 | -4.62643200 | -0.46483600 |
| H | -0.62614100 | -4.70945800 | -0.48641100 |
| H | -1.50807100 | -4.60676800 | 1.06259500  |

### [Bis(acetoxy)iodo]benzene

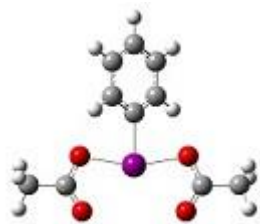

Gibbs Free Energy (hartrees):

M06L/6-31+G(d,p) Gas Phase = -699.770787

|   |             |             |             |
|---|-------------|-------------|-------------|
| I | -0.00001300 | -0.62842900 | -0.00000200 |
| C | 0.00002900  | 1.49387700  | -0.00000200 |
| C | -0.87801000 | 2.16857300  | 0.83980100  |
| C | -0.87372200 | 3.56239900  | 0.83187200  |
| C | 0.00008700  | 4.25851100  | 0.00000300  |
| C | 0.87386700  | 3.56236500  | -0.83186900 |
| C | 0.87809600  | 2.16853900  | -0.83980300 |
| O | -2.18430700 | -0.26110900 | -0.09971400 |
| O | 2.18429400  | -0.26119500 | 0.09971000  |
| C | -2.74406000 | -1.44692900 | -0.14104900 |
| C | 2.74400200  | -1.44703600 | 0.14105200  |
| O | -2.09089300 | -2.49120700 | -0.12808200 |
| O | 2.09079600  | -2.49129000 | 0.12808800  |
| C | -4.24651900 | -1.41436000 | -0.18505300 |
| C | 4.24646200  | -1.41452300 | 0.18505800  |
| H | 0.00011000  | 5.34452000  | 0.00000500  |
| H | -1.55678500 | 4.10025400  | 1.48284900  |
| H | -1.56724300 | 1.62182900  | 1.47332500  |
| H | 1.56730700  | 1.62176800  | -1.47332900 |
| H | 1.55695200  | 4.10019400  | -1.48284400 |
| H | 4.63310600  | -2.39713300 | 0.45146600  |
| H | 4.62921800  | -1.13846900 | -0.80105900 |
| H | 4.59796800  | -0.66062400 | 0.89122000  |
| H | -4.63320000 | -2.39695900 | -0.45145000 |
| H | -4.62926200 | -1.13828200 | 0.80106100  |
| H | -4.59799800 | -0.66045700 | -0.89122300 |

### [Bis(acetoxy)iodo]benzene in MeCN

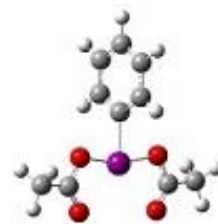

Gibbs Free Energy (hartrees):

B3LYP/6-31+G(d,p) MeCN = -699.866857

|   |             |             |             |
|---|-------------|-------------|-------------|
| I | -0.04854300 | -0.59963800 | -0.00000200 |
| C | 0.11881200  | 1.49925200  | -0.00000100 |
| C | 0.17298100  | 2.16855700  | 1.22252400  |
| C | 0.28603900  | 3.56245000  | 1.21275600  |
| C | 0.34249100  | 4.25620400  | 0.00000100  |
| C | 0.28603900  | 3.56245100  | -1.21275600 |
| C | 0.17298200  | 2.16855900  | -1.22252600 |
| O | -2.19988700 | -0.14505200 | -0.00000400 |
| O | 2.14682900  | -0.48905900 | -0.00000300 |
| C | -2.90058400 | -1.25848500 | -0.00000100 |
| C | 2.66460600  | -1.69848500 | 0.00000400  |
| O | -2.36759600 | -2.37466200 | 0.00000100  |
| O | 1.96358100  | -2.71751000 | 0.00001100  |
| C | -4.39909000 | -1.04901400 | 0.00000400  |
| C | 4.17743900  | -1.72573400 | 0.00000400  |
| H | 0.43044800  | 5.33825200  | 0.00000100  |
| H | 0.32964600  | 4.09956100  | 2.15506900  |
| H | 0.12914100  | 1.62935200  | 2.16217000  |
| H | 0.12914100  | 1.62935500  | -2.16217300 |
| H | 0.32964600  | 4.09956500  | -2.15506800 |
| H | 4.53211300  | -2.75672200 | 0.00001500  |
| H | 4.55619200  | -1.20238700 | -0.88280600 |
| H | 4.55619300  | -1.20236900 | 0.88280400  |
| H | -4.91029100 | -2.01200800 | -0.00001800 |
| H | -4.69158000 | -0.47304800 | 0.88284900  |
| H | -4.69158300 | -0.47300400 | -0.88281200 |

**[Bis(acetoxy)iodo]-4-cyanobenzene**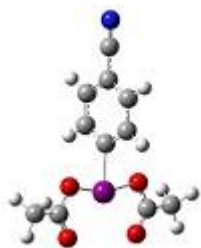

Gibbs Free Energy (hartrees):  
B3LYP/6-31+G(d,p) MeCN = -792.112950

|   |             |             |             |
|---|-------------|-------------|-------------|
| I | -1.07582200 | 0.00000000  | -0.00000400 |
| C | 1.03332000  | 0.00000000  | -0.00000100 |
| C | 1.70552600  | -0.00000100 | -1.22173000 |
| C | 3.09997400  | -0.00000100 | -1.22117600 |
| C | 3.79542900  | 0.00000000  | 0.00000100  |
| C | 3.09997200  | 0.00000100  | 1.22117700  |
| C | 1.70552300  | 0.00000100  | 1.22172800  |
| O | -0.75415500 | -2.17044500 | 0.00000300  |
| O | -0.75415500 | 2.17044500  | 0.00000000  |
| C | -1.91628200 | -2.78851700 | 0.00000100  |
| C | -1.91628100 | 2.78851700  | 0.00000100  |
| O | -2.98743800 | -2.17007700 | -0.00000200 |
| O | -2.98743800 | 2.17007800  | 0.00000300  |
| C | -1.81944900 | -4.29744000 | 0.00000400  |
| C | -1.81944800 | 4.29744000  | 0.00000600  |
| H | 3.64209400  | -0.00000200 | -2.16017800 |
| H | 1.16793400  | -0.00000200 | -2.16272600 |
| H | 1.16792900  | 0.00000200  | 2.16272400  |
| H | 3.64209000  | 0.00000200  | 2.16018100  |
| H | -2.81779100 | 4.73537100  | -0.00000500 |
| H | -1.26672400 | 4.63151500  | 0.88290500  |
| H | -1.26670100 | 4.63152100  | -0.88287600 |
| H | -2.81779100 | -4.73537100 | 0.00000100  |
| H | -1.26671000 | -4.63151900 | -0.88288400 |
| H | -1.26671600 | -4.63151700 | 0.88289600  |
| C | 5.23158700  | 0.00000000  | 0.00000300  |
| N | 6.39531600  | 0.00000000  | 0.00000500  |

**[Bis(acetoxy)iodo]-4-fluorobenzene**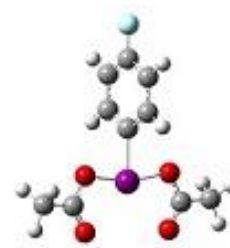

Gibbs Free Energy (hartrees):  
B3LYP/6-31+G(d,p) MeCN = -799.115206

|   |             |             |             |
|---|-------------|-------------|-------------|
| I | -0.87485000 | 0.00000000  | -0.00000200 |
| C | 1.22434700  | 0.00000000  | -0.00000100 |
| C | 1.90032100  | -0.00000100 | 1.22138000  |
| C | 3.29673200  | -0.00000100 | 1.22270400  |
| C | 3.95863600  | 0.00000000  | 0.00000200  |
| C | 3.29673300  | 0.00000100  | -1.22270200 |
| C | 1.90032200  | 0.00000100  | -1.22138000 |
| O | -0.58681800 | 2.17922100  | 0.00000000  |
| O | -0.58681900 | -2.17922100 | -0.00000300 |
| C | -1.75345900 | 2.78744400  | 0.00000300  |
| C | -1.75345900 | -2.78744400 | 0.00000100  |
| O | -2.82172900 | 2.16376500  | 0.00000200  |
| O | -2.82172900 | -2.16376500 | 0.00000700  |
| C | -1.66693100 | 4.29773000  | 0.00000100  |
| C | -1.66693100 | -4.29773000 | 0.00000000  |
| H | 3.85786300  | -0.00000100 | 2.15043800  |
| H | 1.36356500  | -0.00000100 | 2.16311400  |
| H | 1.36356800  | 0.00000100  | -2.16311500 |
| H | 3.85786600  | 0.00000100  | -2.15043500 |
| H | -2.66813200 | -4.72924600 | 0.00001700  |
| H | -1.11651800 | -4.63585600 | -0.88284100 |
| H | -1.11648500 | -4.63585700 | 0.88281900  |
| H | -2.66813200 | 4.72924600  | 0.00000100  |
| H | -1.11650000 | 4.63585800  | 0.88283000  |
| H | -1.11650200 | 4.63585600  | -0.88283000 |
| F | 5.31614800  | 0.00000000  | 0.00000300  |

### [Bis(acetoxy)iodo]-4-methylbenzene

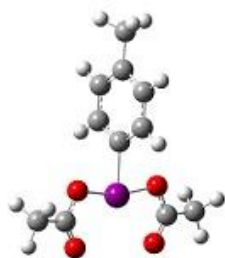

Gibbs Free Energy (hartrees):  
B3LYP/6-31+G(d,p) MeCN = -739.164602

|   |             |             |             |
|---|-------------|-------------|-------------|
| I | -0.89048000 | 0.00201600  | -0.00000100 |
| C | 1.20992200  | -0.00328500 | 0.00000100  |
| C | 1.88821100  | -0.00742100 | -1.21859500 |
| C | 3.28470600  | -0.01528700 | -1.20595500 |
| C | 4.00390000  | -0.01601000 | 0.00000300  |
| C | 3.28470500  | -0.01523300 | 1.20595900  |
| C | 1.88821000  | -0.00736700 | 1.21859800  |
| O | -0.62375100 | -2.18261100 | 0.00005800  |
| O | -0.61280600 | 2.18518300  | -0.00005900 |
| C | -1.79154800 | -2.78786600 | 0.00007400  |
| C | -1.77768700 | 2.79606500  | -0.00007600 |
| O | -2.86023400 | -2.16500500 | 0.00005700  |
| O | -2.84933500 | 2.17832200  | -0.00006000 |
| C | -1.70614900 | -4.29886500 | 0.00011200  |
| C | -1.68511100 | 4.30662700  | -0.00011400 |
| H | 3.81874600  | -0.02251500 | -2.15208700 |
| H | 1.35283200  | -0.00825100 | -2.16165900 |
| H | 1.35283000  | -0.00815500 | 2.16166000  |
| H | 3.81874400  | -0.02242000 | 2.15209300  |
| H | -2.68454700 | 4.74233000  | -0.00014500 |
| H | -1.13339900 | 4.64280600  | 0.88268600  |
| H | -1.13336100 | 4.64276200  | -0.88290500 |
| H | -2.70761900 | -4.72987100 | 0.00014600  |
| H | -1.15601700 | -4.63764400 | -0.88268000 |
| H | -1.15597400 | -4.63760100 | 0.88289400  |
| C | 5.51298200  | 0.00555500  | 0.00000300  |
| H | 5.88275900  | 1.03844800  | -0.00002600 |
| H | 5.91829100  | -0.48763500 | 0.88798300  |
| H | 5.91829200  | -0.48768400 | -0.88794900 |

### [Bis(acetoxy)iodo]-4-nitrobenzene

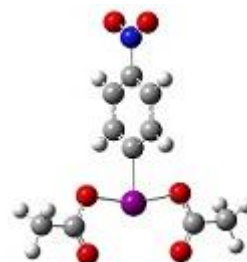

Gibbs Free Energy (hartrees):  
B3LYP/6-31+G(d,p) MeCN = -904.373771

|   |             |             |             |
|---|-------------|-------------|-------------|
| I | -1.38152900 | 0.00000000  | -0.00000600 |
| C | 0.72842100  | 0.00000000  | -0.00000300 |
| C | 1.40042100  | 0.00000200  | -1.22230500 |
| C | 2.79530200  | 0.00000200  | -1.22357200 |
| C | 3.46422100  | 0.00000000  | 0.00000000  |
| C | 2.79529900  | -0.00000300 | 1.22357000  |
| C | 1.40041800  | -0.00000300 | 1.22230000  |
| O | -1.04814600 | -2.16725700 | 0.00000100  |
| O | -1.04814600 | 2.16725700  | 0.00000700  |
| C | -2.20906400 | -2.78802200 | 0.00000900  |
| C | -2.20906300 | 2.78802200  | -0.00000100 |
| O | -3.28067600 | -2.17038600 | 0.00001400  |
| O | -3.28067500 | 2.17038600  | -0.00001000 |
| C | -2.10994800 | -4.29648800 | 0.00001000  |
| C | -2.10994700 | 4.29648800  | 0.00000700  |
| H | 3.34946000  | 0.00000400  | -2.15351200 |
| H | 0.86303100  | 0.00000500  | -2.16319900 |
| H | 0.86302600  | -0.00000500 | 2.16319300  |
| H | 3.34945400  | -0.00000500 | 2.15351200  |
| H | -3.10765300 | 4.73580600  | -0.00001100 |
| H | -1.55670600 | 4.62959200  | 0.88293400  |
| H | -1.55666900 | 4.62960100  | -0.88289400 |
| H | -3.10765400 | -4.73580600 | 0.00001500  |
| H | -1.55669200 | -4.62959800 | -0.88290600 |
| H | -1.55668500 | -4.62959500 | 0.88292200  |
| N | 4.93699000  | -0.00000100 | 0.00000200  |
| O | 5.51649900  | -0.00000200 | 1.08812100  |
| O | 5.51650100  | 0.00000200  | -1.08811500 |

**[Bis(acetoxy)iodo]-4-methoxybenzene**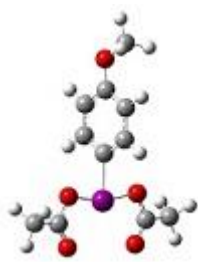

Gibbs Free Energy (hartrees):  
B3LYP/6-31+G(d,p) MeCN = -814.369276

|   |             |             |             |
|---|-------------|-------------|-------------|
| I | -1.15804500 | 0.00000000  | -0.01094900 |
| C | 0.92840400  | 0.00000000  | 0.10727100  |
| C | 1.67779700  | 0.00000200  | -1.06753900 |
| C | 3.07297300  | 0.00000100  | -0.99539100 |
| C | 3.70409200  | -0.00000100 | 0.25906900  |
| C | 2.93173600  | -0.00000300 | 1.43587000  |
| C | 1.54457500  | -0.00000300 | 1.36434200  |
| O | -0.90263800 | -2.18984900 | 0.00475100  |
| O | -0.90263800 | 2.18984900  | 0.00475600  |
| C | -2.07189700 | -2.78867200 | -0.05143600 |
| C | -2.07189600 | 2.78867300  | -0.05143600 |
| O | -3.13643500 | -2.16066200 | -0.10649600 |
| O | -3.13643400 | 2.16066300  | -0.10650200 |
| C | -1.99525500 | -4.30035900 | -0.04397100 |
| C | -1.99525400 | 4.30036000  | -0.04396800 |
| H | 3.64521000  | 0.00000300  | -1.91459400 |
| H | 1.19679800  | 0.00000300  | -2.03946300 |
| H | 0.95970100  | -0.00000400 | 2.27744900  |
| H | 3.43521600  | -0.00000500 | 2.39695700  |
| H | -2.99853600 | 4.72587600  | -0.07751300 |
| H | -1.47691500 | 4.64028900  | 0.85733400  |
| H | -1.41776800 | 4.64423600  | -0.90722300 |
| H | -2.99853800 | -4.72587500 | -0.07751300 |
| H | -1.41777400 | -4.64423400 | -0.90722900 |
| H | -1.47691300 | -4.64029100 | 0.85732700  |
| O | 5.04760200  | -0.00000200 | 0.43825300  |
| C | 5.90269900  | 0.00000100  | -0.71307600 |
| H | 5.74143600  | 0.89699600  | -1.31993700 |
| H | 6.91951500  | 0.00000100  | -0.32187800 |
| H | 5.74143600  | -0.89699200 | -1.31994000 |

**[Bis(acetoxy)iodo]-2-chlorobenzene**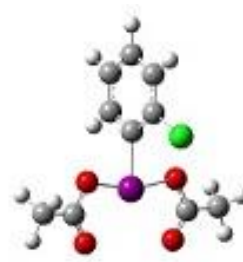

Gibbs Free Energy (hartrees):  
B3LYP/6-31+G(d,p) MeCN = -1159.463253

|    |             |             |             |
|----|-------------|-------------|-------------|
| I  | -0.77371400 | 0.01379800  | -0.15398400 |
| C  | 1.31187000  | -0.03578800 | -0.40618900 |
| C  | 1.80490200  | -0.07336700 | -1.71271900 |
| C  | 3.18311100  | -0.10828200 | -1.93232800 |
| C  | 4.05972200  | -0.10490800 | -0.84520400 |
| C  | 3.56818700  | -0.06726900 | 0.46091400  |
| C  | 2.18921500  | -0.03259900 | 0.68529600  |
| O  | -0.51123600 | -2.16603200 | -0.15651400 |
| O  | -0.41327900 | 2.17938900  | -0.18399300 |
| C  | -1.68528700 | -2.74970500 | -0.04715400 |
| C  | -1.55983700 | 2.81593700  | -0.07788400 |
| O  | -2.73536900 | -2.10034000 | 0.03251500  |
| O  | -2.63745200 | 2.21474700  | 0.01204700  |
| C  | -1.63119500 | -4.26066200 | -0.02193900 |
| C  | -1.43893100 | 4.32317500  | -0.07098100 |
| H  | 3.56333300  | -0.13759700 | -2.94792200 |
| H  | 1.12105300  | -0.07644100 | -2.55423900 |
| H  | -2.42974700 | 4.77678900  | -0.03831100 |
| H  | -0.85940500 | 4.63884400  | 0.80185600  |
| H  | -0.90295500 | 4.65813700  | -0.96339900 |
| H  | -2.64144300 | -4.66994300 | -0.00031100 |
| H  | -1.09575800 | -4.62986300 | -0.90098300 |
| H  | -1.08077000 | -4.59060800 | 0.86443500  |
| H  | 5.13241000  | -0.13163600 | -1.00763700 |
| H  | 4.24545600  | -0.06472400 | 1.30766900  |
| Cl | 1.61898800  | 0.01379100  | 2.33980600  |

### [Bis(acetoxy)iodo]-3-chlorobenzene

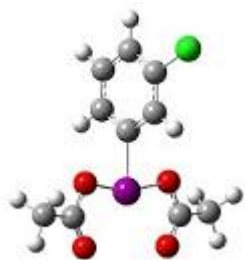

Gibbs Free Energy (hartrees):

B3LYP/6-31+G(d,p) MeCN = -1159.467265

|    |             |             |             |
|----|-------------|-------------|-------------|
| I  | 1.05567800  | 0.00000000  | 0.01498900  |
| C  | -0.99332600 | 0.00000000  | 0.50237800  |
| C  | -1.36721400 | 0.00000000  | 1.84489000  |
| C  | -2.73081600 | 0.00000000  | 2.15318600  |
| C  | -3.69181400 | 0.00000000  | 1.13977600  |
| C  | -3.27639400 | 0.00000000  | -0.19298300 |
| C  | -1.92293100 | 0.00000000  | -0.53678400 |
| O  | 0.76057300  | -2.17506600 | 0.08395800  |
| O  | 0.76057300  | 2.17506600  | 0.08396000  |
| C  | 1.89260600  | -2.78785200 | -0.18887700 |
| C  | 1.89260500  | 2.78785200  | -0.18887600 |
| O  | 2.93293900  | -2.16694400 | -0.43851000 |
| O  | 2.93293900  | 2.16694400  | -0.43850900 |
| C  | 1.80447800  | -4.29753500 | -0.16394500 |
| C  | 1.80447700  | 4.29753500  | -0.16394600 |
| H  | -3.04557300 | 0.00000000  | 3.19169400  |
| H  | -0.62677800 | 0.00000000  | 2.63622300  |
| H  | -1.62070200 | 0.00000000  | -1.57707600 |
| H  | 2.76393200  | 4.73219900  | -0.44521200 |
| H  | 1.02453100  | 4.63618400  | -0.85172400 |
| H  | 1.52798400  | 4.63121800  | 0.84077900  |
| H  | 2.76392400  | -4.73219800 | -0.44524200 |
| H  | 1.52802200  | -4.63121600 | 0.84079100  |
| H  | 1.02450800  | -4.63618600 | -0.85169300 |
| Cl | -4.47695500 | -0.00000100 | -1.47473800 |
| H  | -4.74876800 | 0.00000000  | 1.38151100  |

### [Bis(acetoxy)iodo]-4-chlorobenzene

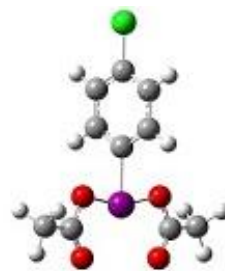

Gibbs Free Energy (hartrees):

B3LYP/6-31+G(d,p) MeCN = -1159.468012

|    |             |             |             |
|----|-------------|-------------|-------------|
| I  | 1.16775100  | 0.00000000  | 0.00000100  |
| C  | -0.93398000 | 0.00000000  | 0.00000000  |
| C  | -1.61070400 | -0.00000300 | -1.21936200 |
| C  | -3.00736600 | -0.00000300 | -1.21910300 |
| C  | -3.68795300 | 0.00000000  | 0.00000000  |
| C  | -3.00736700 | 0.00000300  | 1.21910300  |
| C  | -1.61070500 | 0.00000300  | 1.21936200  |
| O  | 0.87300800  | 2.17767300  | -0.00000100 |
| O  | 0.87300800  | -2.17767300 | 0.00000200  |
| C  | 2.03861400  | 2.78809000  | -0.00000100 |
| C  | 2.03861500  | -2.78809000 | -0.00000100 |
| O  | 3.10769700  | 2.16587500  | 0.00000300  |
| O  | 3.10769700  | -2.16587400 | -0.00000500 |
| C  | 1.94953800  | 4.29811700  | 0.00000000  |
| C  | 1.94953800  | -4.29811700 | 0.00000000  |
| H  | -3.55192700 | -0.00000600 | -2.15653000 |
| H  | -1.07635000 | -0.00000600 | -2.16260000 |
| H  | -1.07635100 | 0.00000600  | 2.16260100  |
| H  | -3.55192700 | 0.00000500  | 2.15653000  |
| H  | 2.95003100  | -4.73124600 | -0.00001700 |
| H  | 1.39855000  | -4.63526400 | 0.88284800  |
| H  | 1.39852000  | -4.63526500 | -0.88283000 |
| H  | 2.95003000  | 4.73124600  | 0.00000300  |
| H  | 1.39853700  | 4.63526500  | -0.88284000 |
| H  | 1.39853200  | 4.63526400  | 0.88283700  |
| Cl | -5.44288800 | 0.00000000  | -0.00000100 |

## 2-[Bis(acetoxy)iodo]pyridine

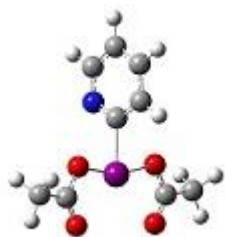

Gibbs Free Energy (hartrees):  
B3LYP/6-31+G(d,p) MeCN = -715.914418

|   |             |             |             |
|---|-------------|-------------|-------------|
| I | -0.00000200 | -0.62559700 | 0.00499100  |
| C | 0.00000400  | 1.51672700  | 0.00302900  |
| C | 0.00000500  | 2.18298300  | 1.22489200  |
| C | 0.00000800  | 3.57974000  | 1.16523300  |
| C | 0.00001100  | 4.20807500  | -0.08126300 |
| C | 0.00001000  | 3.41849700  | -1.23295000 |
| O | -2.16877300 | -0.29329500 | 0.01156900  |
| O | 2.16877100  | -0.29330600 | 0.01156900  |
| C | -2.81062600 | -1.44222900 | -0.00403400 |
| C | 2.81061900  | -1.44224200 | -0.00403300 |
| O | -2.21962600 | -2.52812600 | -0.01573600 |
| O | 2.21961400  | -2.52813700 | -0.01573600 |
| C | -4.31768600 | -1.30996800 | -0.00849200 |
| C | 4.31767900  | -1.30998900 | -0.00849100 |
| H | 0.00000900  | 4.16061300  | 2.08197400  |
| H | 0.00000200  | 1.65332000  | 2.16956600  |
| H | 4.77888600  | -2.29780900 | 0.00206900  |
| H | 4.63590900  | -0.76197500 | -0.90033800 |
| H | 4.64243600  | -0.73766700 | 0.86520800  |
| H | -4.77889800 | -2.29778600 | 0.00206700  |
| H | -4.64244000 | -0.73764500 | 0.86520800  |
| H | -4.63591300 | -0.76195100 | -0.90033700 |
| H | 0.00001400  | 5.28944500  | -0.16431800 |
| H | 0.00001200  | 3.86503200  | -2.22280700 |
| N | 0.00000600  | 2.07377000  | -1.18849900 |

## 3-[Bis(acetoxy)iodo]pyridine

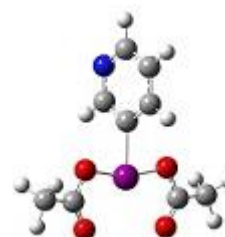

Gibbs Free Energy (hartrees):  
B3LYP/6-31+G(d,p) MeCN = -715.911609

|   |             |             |             |
|---|-------------|-------------|-------------|
| I | 0.00000200  | -0.60685100 | 0.00278400  |
| C | -0.00000600 | 1.49633200  | 0.01461200  |
| C | -0.00000700 | 2.18958800  | 1.22247000  |
| C | -0.00001300 | 3.58373100  | 1.16147000  |
| C | -0.00001700 | 4.19889500  | -0.09253800 |
| C | -0.00001000 | 2.18418300  | -1.19972600 |
| O | -2.17285300 | -0.29758800 | 0.00511200  |
| O | 2.17285500  | -0.29757100 | 0.00511100  |
| C | -2.78800800 | -1.46118400 | 0.00213500  |
| C | 2.78801900  | -1.46116300 | 0.00213400  |
| O | -2.16813600 | -2.53149500 | 0.00008000  |
| O | 2.16815600  | -2.53147900 | 0.00007900  |
| C | -4.29732100 | -1.36726300 | -0.00208600 |
| C | 4.29733200  | -1.36723100 | -0.00208600 |
| H | -0.00001500 | 4.17911800  | 2.06810300  |
| H | -0.00000400 | 1.67508300  | 2.17699700  |
| H | -0.00000800 | 1.65528900  | -2.14858600 |
| H | 4.73347300  | -2.36590100 | 0.02907100  |
| H | 4.62971500  | -0.84597000 | -0.90479100 |
| H | 4.63543100  | -0.78512200 | 0.85991600  |
| H | -4.73345500 | -2.36593600 | 0.02908300  |
| H | -4.63542500 | -0.78514500 | 0.85990800  |
| H | -4.62970700 | -0.84601600 | -0.90479800 |
| H | -0.00002100 | 5.28293100  | -0.17150600 |
| N | -0.00001500 | 3.52206900  | -1.25176200 |



### 4-[Bis(acetoxy)iodo]pyridine

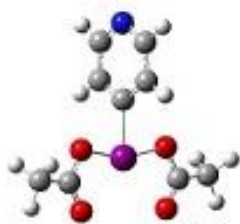

Gibbs Free Energy (hartrees):  
B3LYP/6-31+G(d,p) MeCN = -715.910461

|   |             |             |             |
|---|-------------|-------------|-------------|
| I | 0.00004300  | -0.62406000 | 0.00000000  |
| C | -0.00009800 | 1.49118300  | 0.00000000  |
| C | -0.00014500 | 2.17677200  | -1.20904900 |
| C | -0.00024500 | 3.57540000  | -1.14702900 |
| C | -0.00024400 | 3.57539900  | 1.14703200  |
| C | -0.00014500 | 2.17677100  | 1.20905000  |
| O | 2.16689000  | -0.29118900 | -0.00000100 |
| O | -2.16684600 | -0.29147400 | 0.00000000  |
| C | 2.79176900  | -1.44989500 | -0.00000100 |
| C | -2.79157400 | -1.45026100 | 0.00000000  |
| O | 2.17936500  | -2.52436800 | -0.00000100 |
| O | -2.17903100 | -2.52465400 | 0.00000000  |
| C | 4.29998600  | -1.34411300 | -0.00000100 |
| C | -4.29980500 | -1.34467300 | 0.00000100  |
| H | -0.00028600 | 4.15400300  | -2.06719200 |
| H | -0.00010800 | 1.67217800  | -2.16792400 |
| H | -0.00010800 | 1.67217600  | 2.16792500  |
| H | -0.00028500 | 4.15400200  | 2.06719500  |
| H | -4.74341300 | -2.34049600 | 0.00000000  |
| H | -4.63065800 | -0.79001700 | 0.88289300  |
| H | -4.63065900 | -0.79001500 | -0.88289000 |
| H | 4.74372100  | -2.33987900 | -0.00000100 |
| H | 4.63076800  | -0.78941400 | -0.88289400 |
| H | 4.63076900  | -0.78941300 | 0.88289000  |
| N | -0.00029400 | 4.26800800  | 0.00000200  |

### [Bis(acetoxy)iodo]-4-trichloromethylbenzene

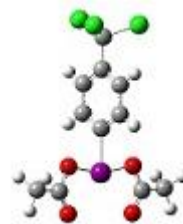

Gibbs Free Energy (hartrees):  
B3LYP/6-31+G(d,p) MeCN = -2117.941413

|    |             |             |             |
|----|-------------|-------------|-------------|
| I  | 2.30348100  | -0.00028200 | 0.00404800  |
| C  | 0.19749400  | 0.00004600  | 0.02755700  |
| C  | -0.49428100 | 0.00902200  | -1.18429400 |
| C  | -1.88610600 | 0.00746100  | -1.16142400 |
| C  | -2.58143800 | -0.00406000 | 0.05927600  |
| C  | -1.86550700 | -0.01165600 | 1.25968200  |
| C  | -0.46648400 | -0.00954000 | 1.24852400  |
| O  | 1.99371900  | 2.17303400  | 0.00899200  |
| O  | 1.99180200  | -2.17339700 | 0.00327400  |
| C  | 3.15693800  | 2.78851400  | -0.00239600 |
| C  | 3.15431400  | -2.79019400 | -0.00752100 |
| O  | 4.22764700  | 2.16938600  | -0.01309500 |
| O  | 4.22577400  | -2.17234800 | -0.01654300 |
| C  | 3.06221400  | 4.29787500  | -0.00234500 |
| C  | 3.05775300  | -4.29945800 | -0.00687600 |
| H  | -2.42469200 | 0.01459000  | -2.10256300 |
| H  | 0.02752000  | 0.01672800  | -2.13417400 |
| H  | 0.07397100  | -0.01593300 | 2.18800400  |
| H  | -2.37733700 | -0.01935300 | 2.21310900  |
| H  | 4.05600600  | -4.73735900 | -0.02293200 |
| H  | 2.51966700  | -4.63380000 | 0.88498700  |
| H  | 2.49063100  | -4.63369700 | -0.88049500 |
| H  | 4.06114300  | 4.73452700  | 0.00010200  |
| H  | 2.51299200  | 4.63225200  | -0.88741400 |
| H  | 2.50694200  | 4.63343700  | 0.87831100  |
| C  | -4.10551600 | -0.00094800 | 0.01731500  |
| Cl | -4.87053200 | -0.05535700 | 1.64354500  |
| Cl | -4.69902200 | -1.43829500 | -0.92153200 |
| Cl | -4.69039600 | 1.50116600  | -0.82186400 |

**[Bis(acetoxy)iodo]-4-trifluoromethylbenzene**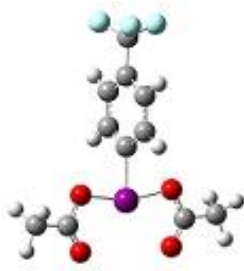

Gibbs Free Energy (hartrees):

B3LYP/6-31+G(d,p) MeCN = -1036.922908

|   |             |             |             |
|---|-------------|-------------|-------------|
| I | -1.67228600 | 0.00667600  | -0.00077200 |
| C | 0.43583900  | -0.01750800 | 0.00045600  |
| C | 1.10968900  | -0.02452800 | -1.21963000 |
| C | 2.50561500  | -0.04008700 | -1.21391000 |
| C | 3.19561700  | -0.05115900 | 0.00263500  |
| C | 2.50403800  | -0.04198600 | 1.21779300  |
| C | 1.10776400  | -0.02644300 | 1.22123900  |
| O | -1.38279400 | -2.16879900 | -0.00075700 |
| O | -1.33140000 | 2.17470400  | -0.00013700 |
| C | -2.55230600 | -2.77255300 | -0.00008900 |
| C | -2.48619100 | 2.80611800  | 0.00045500  |
| O | -3.61646100 | -2.14217700 | -0.00003300 |
| O | -3.56504600 | 2.20124700  | 0.00029300  |
| C | -2.47311800 | -4.28270500 | 0.00054300  |
| C | -2.37113700 | 4.31396700  | 0.00115400  |
| H | 3.04413200  | -0.04848800 | -2.15502300 |
| H | 0.57391800  | -0.01933400 | -2.16168500 |
| H | 0.57067600  | -0.02268800 | 2.16255200  |
| H | 3.04105700  | -0.05169400 | 2.15957100  |
| H | -3.36412200 | 4.76394500  | 0.00399900  |
| H | -1.81198000 | 4.64100400  | 0.88263200  |
| H | -1.81685800 | 4.64190500  | -0.88309800 |
| H | -3.47648900 | -4.70903300 | 0.00237800  |
| H | -1.92584600 | -4.62369000 | -0.88312800 |
| H | -1.92282600 | -4.62292500 | 0.88261600  |
| C | 4.70300000  | -0.01776300 | 0.00080500  |
| F | 5.23214000  | -0.66329900 | -1.06759700 |
| F | 5.17842600  | 1.25880400  | -0.04716200 |
| F | 5.23523500  | -0.58380900 | 1.11103400  |

**[Bis(acetoxy)iodo]-4-trifluoro(methylsulfonyl)benzene**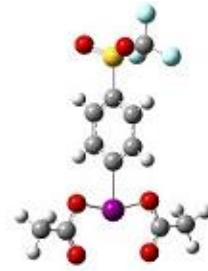

Gibbs Free Energy (hartrees):

B3LYP/6-31+G(d,p) MeCN = -1585.469521

|   |             |             |             |
|---|-------------|-------------|-------------|
| I | -2.51300400 | 0.12034300  | 0.00065300  |
| C | -0.42970300 | -0.21902100 | -0.00028100 |
| C | 0.23123900  | -0.33103100 | 1.22227000  |
| C | 1.60905300  | -0.55638800 | 1.22359100  |
| C | 2.27178100  | -0.66037800 | -0.00189400 |
| C | 1.60803200  | -0.55364900 | -1.22658300 |
| C | 0.23021400  | -0.32851100 | -1.22361300 |
| O | -1.82910200 | 2.20322800  | 0.00001600  |
| O | -2.52563500 | -2.07152100 | 0.00069700  |
| C | -2.87401000 | 3.00414500  | -0.00060200 |
| C | -3.77069100 | -2.49933900 | 0.00066100  |
| O | -4.03130400 | 2.56766100  | -0.00033700 |
| O | -4.72956800 | -1.71807200 | 0.00080100  |
| C | -2.53229000 | 4.47654500  | -0.00185600 |
| C | -3.91377400 | -4.00411100 | 0.00049400  |
| H | 2.14571400  | -0.65974900 | 2.15972500  |
| H | -0.30029800 | -0.25143800 | 2.16324800  |
| H | -0.30214200 | -0.24697800 | -2.16396100 |
| H | -4.96886000 | -4.27827500 | -0.00038100 |
| H | -3.41999500 | -4.42129000 | -0.88195900 |
| H | -3.42155200 | -4.42123900 | 0.88385300  |
| H | -3.44591800 | 5.07127600  | -0.00082600 |
| H | -1.93107400 | 4.71631000  | 0.87996700  |
| H | -1.93393700 | 4.71523200  | -0.88594000 |
| H | 2.14406300  | -0.65474300 | -2.16333000 |
| S | 4.03770800  | -0.96518300 | -0.00316200 |
| O | 4.43787100  | -1.56363200 | 1.27685000  |
| O | 4.43738800  | -1.55276500 | -1.28836200 |
| C | 4.79674800  | 0.77734300  | 0.00357100  |
| F | 6.12645400  | 0.65029000  | -0.01049100 |
| F | 4.42432500  | 1.44071000  | 1.10312100  |
| F | 4.40289700  | 1.45820200  | -1.07777400 |

### [Bis(trichloroacetoxy)iodo]benzene

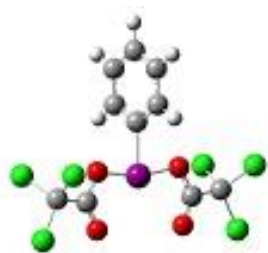

Gibbs Free Energy (hartrees):

B3LYP/6-31+G(d,p) MeCN = -3457.407121

|    |             |             |             |
|----|-------------|-------------|-------------|
| I  | 0.00000000  | -0.13273500 | -0.00000200 |
| C  | 0.00000000  | 1.96784100  | 0.00000000  |
| C  | 0.00000000  | 2.63254700  | 1.22661200  |
| C  | 0.00000000  | 4.03026200  | 1.21398400  |
| C  | 0.00000000  | 4.72449700  | 0.00000200  |
| C  | 0.00000000  | 4.03026400  | -1.21398100 |
| C  | 0.00000000  | 2.63254900  | -1.22661200 |
| O  | -2.18466000 | 0.10950000  | -0.00000200 |
| O  | 2.18466000  | 0.10950000  | -0.00000200 |
| C  | -2.80789400 | -1.03035100 | 0.00000000  |
| C  | 2.80789400  | -1.03035100 | -0.00000100 |
| O  | -2.29540900 | -2.13792700 | -0.00000100 |
| O  | 2.29540900  | -2.13792700 | -0.00000100 |
| C  | -4.36834400 | -0.84322200 | 0.00000100  |
| C  | 4.36834400  | -0.84322200 | 0.00000100  |
| H  | 0.00000000  | 5.80994800  | 0.00000300  |
| H  | 0.00000000  | 4.56965300  | 2.15569500  |
| H  | 0.00000000  | 2.09079600  | 2.16538500  |
| H  | 0.00000000  | 2.09080000  | -2.16538500 |
| H  | 0.00000000  | 4.56965700  | -2.15569200 |
| Cl | -4.83852000 | 0.07712400  | 1.47443400  |
| Cl | -5.19212700 | -2.42676900 | 0.00000500  |
| Cl | -4.83852300 | 0.07711700  | -1.47443500 |
| Cl | 4.83852100  | 0.07712400  | 1.47443400  |
| Cl | 5.19212700  | -2.42676900 | 0.00000500  |
| Cl | 4.83852300  | 0.07711800  | -1.47443500 |

### [Bis(trifluoroacetoxy)iodo]benzene

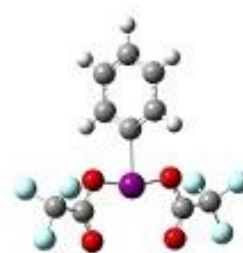

Gibbs Free Energy (hartrees):

B3LYP/6-31+G(d,p) MeCN = -1295.361142

|   |             |             |             |
|---|-------------|-------------|-------------|
| I | 0.00000000  | 0.31238800  | 0.00000100  |
| C | 0.00000000  | -1.78875900 | -0.00000100 |
| C | 0.00000000  | -2.45229300 | 1.22717100  |
| C | 0.00000000  | -3.84997600 | 1.21408300  |
| C | 0.00000000  | -4.54402800 | -0.00000400 |
| C | 0.00000000  | -3.84997400 | -1.21408900 |
| C | 0.00000000  | -2.45229100 | -1.22717400 |
| O | 2.18973600  | 0.07295200  | 0.00000100  |
| O | -2.18973600 | 0.07295200  | 0.00000200  |
| C | 2.81785300  | 1.20891800  | -0.00000200 |
| C | -2.81785300 | 1.20891800  | 0.00000100  |
| O | 2.33190200  | 2.32877200  | -0.00000700 |
| O | -2.33190200 | 2.32877200  | -0.00000100 |
| C | 4.36232300  | 1.00262500  | 0.00000100  |
| C | -4.36232300 | 1.00262500  | 0.00000100  |
| H | 0.00000000  | -5.62945800 | -0.00000500 |
| H | 0.00000000  | -4.38940700 | 2.15574500  |
| H | 0.00000000  | -1.91052500 | 2.16585900  |
| H | 0.00000000  | -1.91052100 | -2.16586200 |
| H | 0.00000000  | -4.38940300 | -2.15575200 |
| F | -4.75304100 | 0.30949300  | -1.09167900 |
| F | -4.75304100 | 0.30949000  | 1.09167900  |
| F | -5.01125100 | 2.17716300  | 0.00000200  |
| F | 5.01125100  | 2.17716300  | -0.00002300 |
| F | 4.75304100  | 0.30946900  | -1.09166400 |
| F | 4.75304000  | 0.30951300  | 1.09169400  |

# [Bis(benzoyloxy)iodo]benzene

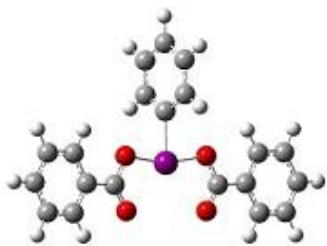

Gibbs Free Energy (hartrees):

B3LYP/6-31+G(d,p) MeCN = -1083.259833

|   |             |             |             |   |             |             |            |
|---|-------------|-------------|-------------|---|-------------|-------------|------------|
| I | 0.00000000  | 0.19194200  | -0.00000100 | C | -4.95922000 | -0.20909700 | 0.00006700 |
| C | 0.00000100  | -1.91403000 | 0.00000300  | C | -6.39678600 | 2.19418200  | 0.00007600 |
| C | -0.00001200 | -2.58530400 | -1.22272000 | H | -4.46348200 | 3.16117400  | 0.00004700 |
| C | -0.00001100 | -3.98376800 | -1.21287300 | C | -6.35530400 | -0.23043800 | 0.00008500 |
| C | 0.00000200  | -4.67969300 | 0.00000600  | H | -4.39546500 | -1.13526800 | 0.00006400 |
| C | 0.00001400  | -3.98376400 | 1.21288400  | C | -7.07540200 | 0.96970800  | 0.00009000 |
| C | 0.00001300  | -2.58530100 | 1.22272700  | H | -6.95412800 | 3.12619700  | 0.00007900 |
| O | -2.17232700 | -0.09173600 | 0.00002700  | H | -6.88069800 | -1.18081800 | 0.00009600 |
| O | 2.17232600  | -0.09173500 | -0.00002700 | H | -8.16144100 | 0.95101300  | 0.00010400 |
| C | -2.78075600 | 1.07521900  | 0.00003300  |   |             |             |            |
| C | 2.78075500  | 1.07522100  | -0.00003500 |   |             |             |            |
| O | -2.15298900 | 2.14413900  | 0.00002200  |   |             |             |            |
| O | 2.15298900  | 2.14414100  | -0.00002900 |   |             |             |            |
| H | 0.00000200  | -5.76530900 | 0.00000800  |   |             |             |            |
| H | -0.00002100 | -4.52279200 | -2.15509100 |   |             |             |            |
| H | -0.00002100 | -2.04423600 | -2.16233000 |   |             |             |            |
| H | 0.00002300  | -2.04423000 | 2.16233600  |   |             |             |            |
| H | 0.00002300  | -4.52278600 | 2.15510400  |   |             |             |            |
| C | 4.27595000  | 1.01746000  | -0.00005500 |   |             |             |            |
| C | 5.00141300  | 2.21917800  | -0.00006400 |   |             |             |            |
| C | 4.95921900  | -0.20909700 | -0.00006500 |   |             |             |            |
| C | 6.39678600  | 2.19418300  | -0.00008300 |   |             |             |            |
| H | 4.46348200  | 3.16117500  | -0.00005700 |   |             |             |            |
| C | 6.35530200  | -0.23043800 | -0.00008300 |   |             |             |            |
| H | 4.39546400  | -1.13526700 | -0.00005800 |   |             |             |            |
| C | 7.07540100  | 0.96970800  | -0.00009200 |   |             |             |            |
| H | 6.95412800  | 3.12619700  | -0.00009000 |   |             |             |            |
| H | 6.88069700  | -1.18081800 | -0.00009100 |   |             |             |            |
| H | 8.16144100  | 0.95101200  | -0.00010700 |   |             |             |            |
| C | -4.27595100 | 1.01745900  | 0.00005300  |   |             |             |            |
| C | -5.00141400 | 2.21917700  | 0.00005800  |   |             |             |            |

# [Bis(isonicotinoyloxy)iodo]benzene

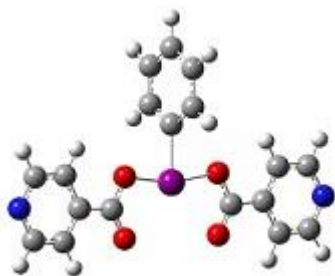

Gibbs Free Energy (hartrees):

B3LYP/6-31+G(d,p) MeCN = -1115.351161

|   |             |             |             |   |             |             |             |
|---|-------------|-------------|-------------|---|-------------|-------------|-------------|
| I | 0.00000000  | 0.20348800  | -0.00000100 | C | -5.03999300 | 2.19059500  | 0.00000100  |
| C | -0.00000100 | -1.90156800 | 0.00000000  | C | -4.96645000 | -0.21276000 | -0.00000200 |
| C | -0.00000600 | -2.57098600 | 1.22372800  | C | -6.43230800 | 2.09421300  | 0.00000000  |
| C | -0.00000600 | -3.96931100 | 1.21313500  | H | -4.54833200 | 3.15674900  | 0.00000300  |
| C | -0.00000100 | -4.66481100 | 0.00000200  | C | -6.36273800 | -0.19972300 | 0.00000000  |
| C | 0.00000400  | -3.96931200 | -1.21313200 | H | -4.42328400 | -1.15035600 | -0.00000400 |
| C | 0.00000400  | -2.57098800 | -1.22372600 | N | -7.09479900 | 0.92581800  | 0.00000000  |
| O | 2.17461400  | -0.07119800 | -0.00000100 | H | -7.04208000 | 2.99438200  | 0.00000300  |
| O | -2.17461300 | -0.07119600 | -0.00000100 | H | -6.91670300 | -1.13529900 | -0.00000300 |
| C | 2.78688000  | 1.08940900  | 0.00000000  |   |             |             |             |
| C | -2.78688000 | 1.08941000  | -0.00000100 |   |             |             |             |
| O | 2.18480900  | 2.16866400  | 0.00000200  |   |             |             |             |
| O | -2.18480900 | 2.16866500  | -0.00000100 |   |             |             |             |
| H | -0.00000200 | -5.75037900 | 0.00000200  |   |             |             |             |
| H | -0.00001000 | -4.50840500 | 2.15523400  |   |             |             |             |
| H | -0.00001000 | -2.02978700 | 2.16314200  |   |             |             |             |
| H | 0.00000900  | -2.02978900 | -2.16314100 |   |             |             |             |
| H | 0.00000700  | -4.50840700 | -2.15523000 |   |             |             |             |
| C | 4.28844900  | 1.01092400  | 0.00000000  |   |             |             |             |
| C | 5.03999300  | 2.19059400  | 0.00000100  |   |             |             |             |
| C | 4.96645100  | -0.21276100 | -0.00000100 |   |             |             |             |
| C | 6.43230900  | 2.09421300  | 0.00000300  |   |             |             |             |
| H | 4.54833200  | 3.15674800  | 0.00000200  |   |             |             |             |
| C | 6.36273900  | -0.19972300 | -0.00000200 |   |             |             |             |
| H | 4.42328600  | -1.15035700 | -0.00000100 |   |             |             |             |
| N | 7.09480000  | 0.92581800  | 0.00000100  |   |             |             |             |
| H | 7.04208000  | 2.99438200  | 0.00000300  |   |             |             |             |
| H | 6.91670500  | -1.13529900 | 0.00000000  |   |             |             |             |
| C | -4.28844800 | 1.01092500  | 0.00000000  |   |             |             |             |

**[Bis(((trifluoromethyl)sulfonyl)oxy)iodo]benzene**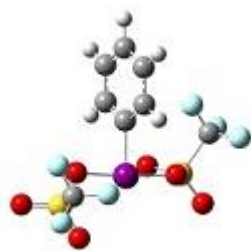

Gibbs Free Energy (hartrees):

B3LYP/6-31+G(d,p) MeCN = -2165.804209

|   |             |             |             |
|---|-------------|-------------|-------------|
| I | -0.18323200 | -0.54004600 | -0.07365400 |
| C | 0.32396800  | 1.48600000  | -0.17437700 |
| C | 0.21240600  | 2.25195200  | 0.98871700  |
| C | 0.56088500  | 3.60159900  | 0.91084000  |
| C | 1.00215000  | 4.14715900  | -0.29994800 |
| C | 1.10075500  | 3.35282900  | -1.44737800 |
| C | 0.76259400  | 1.99882200  | -1.39749600 |
| O | -2.18293300 | 0.14570400  | -0.76261900 |
| O | 1.78358000  | -1.04156900 | 0.70436000  |
| H | 1.27042500  | 5.19764200  | -0.34924800 |
| H | 0.48499400  | 4.22163700  | 1.79799300  |
| H | -0.13265900 | 1.82173500  | 1.92156700  |
| H | 0.84026600  | 1.37549600  | -2.28041000 |
| H | 1.44318000  | 3.78011900  | -2.38410000 |
| S | -3.44489000 | -0.76677100 | -0.67323900 |
| S | 3.02839700  | -1.45973700 | -0.16291700 |
| O | -4.32254400 | -0.53677000 | -1.81863700 |
| O | -3.08431000 | -2.13252900 | -0.27657400 |
| O | 2.81162500  | -1.19525700 | -1.58669000 |
| O | 3.54715600  | -2.75326300 | 0.27565900  |
| C | -4.32684300 | -0.00859800 | 0.80634200  |
| C | 4.26359900  | -0.17421700 | 0.44778500  |
| F | 3.80777100  | 1.05697900  | 0.20063100  |
| F | 4.46539200  | -0.31662300 | 1.76078300  |
| F | 5.42140000  | -0.35382400 | -0.19846500 |
| F | -4.62733500 | 1.27075300  | 0.56200900  |
| F | -5.45494500 | -0.68880400 | 1.04122200  |
| F | -3.53991600 | -0.07668600 | 1.88776200  |

**[Bis(acetoxy)iodo]benzene radical anion**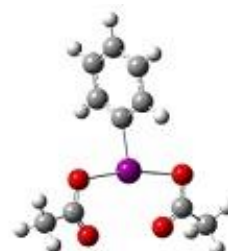

Gibbs Free Energy (hartrees):

B3LYP/6-31+G(d,p) MeCN = -700.032899

|   |             |             |             |
|---|-------------|-------------|-------------|
| I | 0.35421900  | 0.03298200  | -0.00073900 |
| C | -1.50696200 | -0.94033200 | 0.00080100  |
| C | -2.11643100 | -1.26933000 | 1.21845600  |
| C | -3.34947900 | -1.92800400 | 1.21334100  |
| C | -3.96664700 | -2.26042000 | 0.00254400  |
| C | -3.34853200 | -1.93297400 | -1.20912800 |
| C | -2.11547200 | -1.27435800 | -1.21597300 |
| O | 2.37611300  | -2.11248700 | -0.00461200 |
| O | -1.16550100 | 2.33316000  | -0.01467700 |
| C | 3.36569000  | -1.31219800 | -0.00965200 |
| C | -0.35632000 | 3.32746000  | -0.01219400 |
| O | 3.28652600  | -0.05146600 | -0.00632900 |
| O | 0.89430400  | 3.26034800  | -0.00898300 |
| C | 4.76602900  | -1.94188800 | 0.01141100  |
| C | -1.02056000 | 4.71293900  | 0.01507100  |
| H | -4.92378900 | -2.77324100 | 0.00321800  |
| H | -3.82445100 | -2.18043100 | 2.15683600  |
| H | -1.64061700 | -1.01441200 | 2.15966000  |
| H | -1.63891400 | -1.02332300 | -2.15784100 |
| H | -3.82276800 | -2.18925700 | -2.15195500 |
| H | -0.48706800 | 5.39145200  | -0.65605300 |
| H | -2.07528100 | 4.66452000  | -0.26204900 |
| H | -0.94229100 | 5.11521400  | 1.03135800  |
| H | 5.14622900  | -1.91588600 | 1.03936500  |
| H | 4.74343300  | -2.98160100 | -0.32225200 |
| H | 5.45248100  | -1.36291000 | -0.61236900 |

**[Bis(acetoxy)iodo]-4-cyanobenzene  
radical anion**

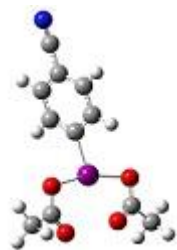

Gibbs Free Energy (hartrees):  
B3LYP/6-31+G(d,p) MeCN = -792.280576

|   |             |             |             |
|---|-------------|-------------|-------------|
| I | -0.80349100 | -0.08402900 | -0.00370200 |
| C | 1.28712300  | -0.32451400 | -0.00145100 |
| C | 1.97686300  | -0.42588100 | -1.21683200 |
| C | 3.35927800  | -0.59830200 | -1.21865400 |
| C | 4.05390000  | -0.67519500 | 0.00215600  |
| C | 3.35840100  | -0.58015200 | 1.22119200  |
| C | 1.97599400  | -0.40788200 | 1.21580200  |
| O | -2.23721200 | -2.71205600 | 0.00566000  |
| O | -0.08099100 | 2.52732900  | -0.01323700 |
| C | -3.36425400 | -2.12653500 | 0.00462400  |
| C | -1.15783300 | 3.22849600  | -0.00708100 |
| O | -3.53258600 | -0.87146900 | -0.00106200 |
| O | -2.32525000 | 2.78489700  | -0.00418300 |
| C | -4.62206000 | -3.00535900 | 0.01065800  |
| C | -0.93867000 | 4.74895400  | 0.01092700  |
| H | 3.89763900  | -0.67301200 | -2.15737100 |
| H | 1.44528200  | -0.36750200 | -2.16030200 |
| H | 1.44368100  | -0.33548200 | 2.15788000  |
| H | 3.89608500  | -0.64081300 | 2.16130700  |
| H | -1.30147300 | 5.14170700  | 0.96649900  |
| H | 0.11248300  | 5.01438300  | -0.11101900 |
| H | -1.53230300 | 5.20597300  | -0.78607900 |
| H | -5.22837100 | -2.77866600 | -0.87268000 |
| H | -4.37333100 | -4.06844400 | 0.01658100  |
| H | -5.22713600 | -2.76842400 | 0.89213800  |
| C | 5.47681800  | -0.85338300 | 0.00405500  |
| N | 6.63248500  | -0.99817900 | 0.00563900  |

**[Bis(acetoxy)iodo]-4-fluorobenzene  
radical anion**

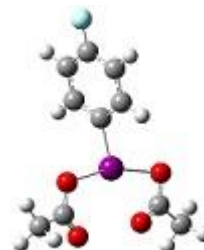

Gibbs Free Energy (hartrees):  
B3LYP/6-31+G(d,p) MeCN = -799.277787

|   |             |             |             |
|---|-------------|-------------|-------------|
| I | -0.60457700 | -0.08554100 | -0.00673200 |
| C | 1.46349200  | -0.45310400 | -0.00147800 |
| C | 2.14549900  | -0.58401600 | 1.21589800  |
| C | 3.51837100  | -0.84107800 | 1.22482300  |
| C | 4.17380500  | -0.96692300 | 0.00542400  |
| C | 3.52314700  | -0.84870100 | -1.21728600 |
| C | 2.15025700  | -0.59158300 | -1.21534100 |
| O | 0.23169000  | 2.50586400  | -0.00817000 |
| O | -2.24664000 | -2.61164800 | 0.00178400  |
| C | -0.79156300 | 3.28241500  | -0.00435800 |
| C | -3.32840100 | -1.94593500 | -0.00656000 |
| O | -1.98879100 | 2.92511200  | -0.00977600 |
| O | -3.40642100 | -0.68228400 | -0.01480000 |
| C | -0.46615200 | 4.78395500  | 0.02076600  |
| C | -4.64352000 | -2.73698800 | 0.02338800  |
| H | 4.06759000  | -0.94231300 | 2.15462200  |
| H | 1.61792500  | -0.48356700 | 2.15830100  |
| H | 1.62642100  | -0.49705500 | -2.16044100 |
| H | 4.07600000  | -0.95576800 | -2.14427500 |
| H | -5.04415300 | -2.71533600 | 1.04371100  |
| H | -5.38338600 | -2.26957600 | -0.63254500 |
| H | -4.49257200 | -3.77890000 | -0.26746300 |
| H | -1.01091700 | 5.28233900  | -0.78652200 |
| H | -0.81850000 | 5.20187900  | 0.96961000  |
| H | 0.60317100  | 4.97541900  | -0.08160200 |
| F | 5.51252300  | -1.21867200 | 0.00882400  |

**[Bis(acetoxy)iodo]-4-methylbenzene radical anion**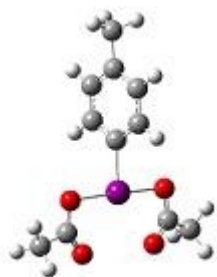

Gibbs Free Energy (hartrees):  
B3LYP/6-31+G(d,p) MeCN = -739.328657

|   |             |             |             |
|---|-------------|-------------|-------------|
| I | 0.68388600  | 0.01093300  | -0.03928700 |
| C | -1.40580700 | -0.07491200 | -0.01516500 |
| C | -2.08921900 | -0.11757100 | 1.20665100  |
| C | -3.48345100 | -0.18671000 | 1.21311100  |
| C | -4.21949600 | -0.21238000 | 0.01697900  |
| C | -3.51195100 | -0.17251800 | -1.19523000 |
| C | -2.11742100 | -0.10361500 | -1.22068000 |
| O | 0.97181900  | -2.83682600 | 0.02148000  |
| O | 0.57782900  | 2.82906800  | 0.01118600  |
| C | 2.24500100  | -2.92030500 | 0.00742600  |
| C | 1.81408500  | 3.15342400  | 0.00637400  |
| O | 3.04412900  | -1.94899600 | -0.05410600 |
| O | 2.78356400  | 2.35541900  | -0.05260400 |
| C | 2.83663700  | -4.33512800 | 0.10347300  |
| C | 2.11453900  | 4.65658200  | 0.11404200  |
| H | -4.00520200 | -0.22328300 | 2.16602100  |
| H | -1.54474700 | -0.10127900 | 2.14502400  |
| H | -1.59528700 | -0.07646200 | -2.17141300 |
| H | -4.05588100 | -0.19778400 | -2.13595800 |
| H | 2.98001000  | 4.91224000  | -0.50294800 |
| H | 1.25420600  | 5.26292700  | -0.17696900 |
| H | 2.36491600  | 4.88715300  | 1.15605400  |
| H | 3.70568300  | -4.42457100 | -0.55406000 |
| H | 3.17752900  | -4.50160800 | 1.13189100  |
| H | 2.09846600  | -5.10013300 | -0.14601100 |
| C | -5.72846000 | -0.25756300 | 0.03584000  |
| H | -6.14628200 | 0.75473400  | 0.10606300  |
| H | -6.12529000 | -0.71333600 | -0.87586200 |
| H | -6.09956500 | -0.82319700 | 0.89578700  |

**[Bis(acetoxy)iodo]-4-nitrobenzene radical anion**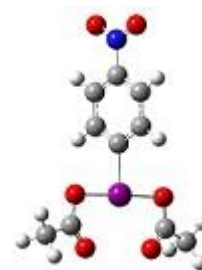

Gibbs Free Energy (hartrees):  
B3LYP/6-31+G(d,p) MeCN = -904.541809

|   |             |             |             |
|---|-------------|-------------|-------------|
| I | 1.18257500  | 0.00161300  | -0.03607500 |
| C | -0.90788700 | -0.04363900 | -0.01807700 |
| C | -1.61328700 | -0.04098400 | -1.23032200 |
| C | -3.00528700 | -0.07601900 | -1.22241600 |
| C | -3.66965400 | -0.11584200 | 0.00592100  |
| C | -2.98281500 | -0.12148200 | 1.22248500  |
| C | -1.59093700 | -0.08519300 | 1.20617600  |
| O | 1.02817000  | 2.78028900  | 0.01024400  |
| O | 1.41672400  | -2.81619400 | 0.00329800  |
| C | 2.26777200  | 3.09542000  | 0.01295300  |
| C | 2.69139600  | -2.88501400 | 0.00104000  |
| O | 3.22897100  | 2.28755700  | -0.03201300 |
| O | 3.47638200  | -1.90138600 | -0.04606500 |
| C | 2.57762600  | 4.59612000  | 0.11048500  |
| C | 3.29861900  | -4.29181800 | 0.09259900  |
| H | -3.56665900 | -0.07288900 | -2.14821200 |
| H | -1.08601000 | -0.01074800 | -2.17698600 |
| H | -1.04633900 | -0.08853900 | 2.14347100  |
| H | -3.52703100 | -0.15288700 | 2.15793900  |
| H | 3.63815300  | -4.45801000 | 1.12134000  |
| H | 2.56975600  | -5.06341800 | -0.16293700 |
| H | 4.17032900  | -4.36683400 | -0.56294500 |
| H | 3.44253300  | 4.84078200  | -0.51145600 |
| H | 1.72006000  | 5.20530200  | -0.18177800 |
| H | 2.83339300  | 4.83036300  | 1.15016400  |
| N | -5.13286200 | -0.15242100 | 0.01876500  |
| O | -5.70775000 | -0.19565300 | 1.11189400  |
| O | -5.72848700 | -0.13848600 | -1.06398900 |



**[Bis(acetoxy)iodo]-4-methoxybenzene radical anion**    **[Bis(acetoxy)iodo]-2-chlorobenzene radical anion**

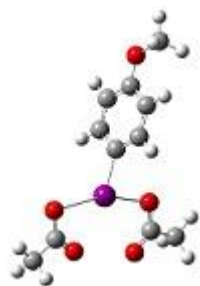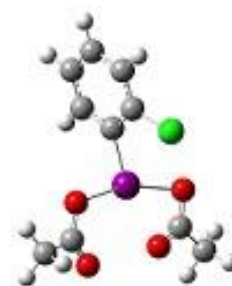

Gibbs Free Energy (hartrees):  
B3LYP/6-31+G(d,p) MeCN = -814.532649

|   |             |             |             |
|---|-------------|-------------|-------------|
| I | -0.87781100 | -0.11474100 | 0.00278500  |
| C | 1.20283300  | -0.27852100 | 0.10976500  |
| C | 1.96212100  | -0.38187700 | -1.06137700 |
| C | 3.35231500  | -0.50699600 | -0.99921500 |
| C | 3.99122100  | -0.53546500 | 0.25061800  |
| C | 3.22756800  | -0.43844400 | 1.42887900  |
| C | 1.84587800  | -0.31461600 | 1.35926700  |
| O | -2.33557200 | -2.79110900 | 0.01533400  |
| O | -0.37001100 | 2.58313300  | -0.05857400 |
| C | -3.46469900 | -2.21645200 | -0.06771800 |
| C | -1.46481000 | 3.25324700  | -0.04585000 |
| O | -3.64468300 | -0.96536500 | -0.14566700 |
| O | -2.62078800 | 2.77933900  | 0.00278000  |
| C | -4.71672900 | -3.10614100 | -0.06378200 |
| C | -1.29055400 | 4.78023500  | -0.07422100 |
| H | 3.91630500  | -0.58035800 | -1.92103500 |
| H | 1.47932100  | -0.36196400 | -2.03301600 |
| H | 1.27074500  | -0.24197000 | 2.27654500  |
| H | 3.73499300  | -0.46242700 | 2.38806400  |
| H | -1.99127700 | 5.21301200  | -0.79381000 |
| H | -1.53929300 | 5.17692700  | 0.91621800  |
| H | -0.26948900 | 5.07215200  | -0.32607500 |
| H | -5.33869300 | -2.87277300 | -0.93408100 |
| H | -4.46021300 | -4.16757700 | -0.07203000 |
| H | -5.31127700 | -2.88760100 | 0.83024500  |
| O | 5.33379300  | -0.65430500 | 0.42444600  |
| C | 6.17484300  | -0.76265800 | -0.73038000 |
| H | 6.09238500  | 0.12887000  | -1.36111700 |
| H | 7.19122600  | -0.84636600 | -0.34641800 |
| H | 5.92739800  | -1.65607900 | -1.31358400 |

Gibbs Free Energy (hartrees):  
B3LYP/6-31+G(d,p) MeCN = -1159.629696

|    |             |             |             |
|----|-------------|-------------|-------------|
| I  | -0.53401100 | -0.05660200 | -0.19280400 |
| C  | 1.46333800  | -0.68747800 | -0.40614100 |
| C  | 1.95449000  | -0.90479300 | -1.70304700 |
| C  | 3.26324300  | -1.34188700 | -1.90970100 |
| C  | 4.10029400  | -1.57223700 | -0.81436700 |
| C  | 3.62773100  | -1.36545200 | 0.48297700  |
| C  | 2.31545100  | -0.92799500 | 0.68260500  |
| O  | -2.60397300 | -2.28934200 | -0.11565600 |
| O  | 0.70120100  | 2.34052300  | -0.19909000 |
| C  | -3.52203900 | -1.41821400 | -0.02972400 |
| C  | -0.16488600 | 3.28513300  | -0.08401700 |
| O  | -3.33591500 | -0.16399500 | -0.00931100 |
| O  | -1.40129300 | 3.14577100  | -0.00000900 |
| C  | -4.96822000 | -1.91751200 | 0.08594800  |
| C  | 0.43902200  | 4.69645600  | -0.02462200 |
| H  | 3.62402200  | -1.50061900 | -2.92101000 |
| H  | 1.30542400  | -0.72718500 | -2.55420700 |
| H  | -0.17631700 | 5.38008700  | -0.61517200 |
| H  | 0.41839900  | 5.03512000  | 1.01701500  |
| H  | 1.47054100  | 4.71630600  | -0.38014700 |
| H  | -5.63769900 | -1.28480600 | -0.50356900 |
| H  | -5.05996900 | -2.95788400 | -0.23392900 |
| H  | -5.28285800 | -1.84686800 | 1.13384700  |
| H  | 5.11990000  | -1.91383400 | -0.96275800 |
| H  | 4.26967100  | -1.54098100 | 1.33936300  |
| Cl | 1.78357500  | -0.68819000 | 2.34189800  |

**[Bis(acetoxy)iodo]-3-chlorobenzene radical anion**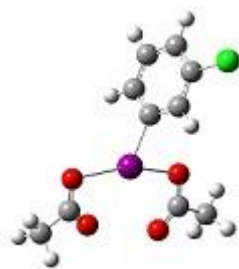

Gibbs Free Energy (hartrees):  
B3LYP/6-31+G(d,p) MeCN = -1159.633442

|    |             |             |             |
|----|-------------|-------------|-------------|
| I  | -0.79288500 | -0.07721300 | 0.12116200  |
| C  | 1.25573600  | -0.36186800 | 0.52077200  |
| C  | 1.70507600  | -0.42569600 | 1.84497600  |
| C  | 3.06328600  | -0.63154000 | 2.10043600  |
| C  | 3.97311000  | -0.77916400 | 1.04971900  |
| C  | 3.49931400  | -0.71671200 | -0.26179200 |
| C  | 2.14887100  | -0.51310800 | -0.54674800 |
| O  | -0.00801200 | 2.51244900  | 0.10032100  |
| O  | -2.39619200 | -2.64499600 | -0.03321000 |
| C  | -1.02201900 | 3.26351500  | -0.14831900 |
| C  | -3.45814200 | -1.98232800 | -0.24383200 |
| O  | -2.19663900 | 2.88124400  | -0.32579600 |
| O  | -3.52414100 | -0.71999400 | -0.32983800 |
| C  | -0.69687800 | 4.76132400  | -0.25279000 |
| C  | -4.76986100 | -2.76720700 | -0.38187900 |
| H  | 3.41788800  | -0.67844700 | 3.12549400  |
| H  | 1.00916600  | -0.31373900 | 2.66927300  |
| H  | 1.80879800  | -0.47053700 | -1.57500300 |
| H  | -5.35635200 | -2.37728400 | -1.21900600 |
| H  | -4.58816000 | -3.83502500 | -0.52138300 |
| H  | -5.36323100 | -2.62786300 | 0.52924800  |
| H  | -1.48769900 | 5.34108000  | 0.23011900  |
| H  | 0.27052100  | 5.00186900  | 0.19130500  |
| H  | -0.67522900 | 5.03507700  | -1.31341200 |
| Cl | 4.63346100  | -0.90323700 | -1.59757800 |
| H  | 5.02727100  | -0.94069600 | 1.24551700  |

**[Bis(acetoxy)iodo]-4-chlorobenzene radical anion**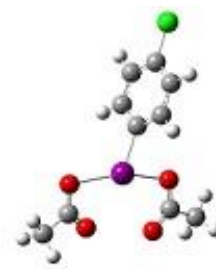

Gibbs Free Energy (hartrees):  
B3LYP/6-31+G(d,p) MeCN = -1159.633715

|    |             |             |             |
|----|-------------|-------------|-------------|
| I  | -0.89866900 | -0.08123600 | -0.00222700 |
| C  | 1.19245400  | -0.28204900 | -0.00084300 |
| C  | 1.88517300  | -0.36844100 | 1.21315900  |
| C  | 3.27432900  | -0.51191500 | 1.21788600  |
| C  | 3.95493900  | -0.57275400 | 0.00045000  |
| C  | 3.27727400  | -0.49483700 | -1.21765600 |
| C  | 1.88812200  | -0.35134800 | -1.21426000 |
| O  | -0.28085200 | 2.57112800  | 0.02273000  |
| O  | -2.28598400 | -2.74831700 | -0.01679700 |
| C  | -1.38120400 | 3.23319800  | 0.01413700  |
| C  | -3.43150800 | -2.19896500 | -0.01323800 |
| O  | -2.53246800 | 2.74737800  | 0.00111300  |
| O  | -3.64206700 | -0.95084100 | -0.01073300 |
| C  | -1.21797300 | 4.76081800  | -0.00304000 |
| C  | -4.65576700 | -3.12466400 | 0.01569200  |
| H  | 3.81496100  | -0.57481200 | 2.15590700  |
| H  | 1.35433000  | -0.32110500 | 2.15803300  |
| H  | 1.35954800  | -0.29068700 | -2.15964100 |
| H  | -5.42729200 | -2.75311500 | -0.66491500 |
| H  | -4.39016400 | -4.15091900 | -0.24707100 |
| H  | -5.07748400 | -3.12066900 | 1.02758700  |
| H  | -1.91501900 | 5.20907900  | 0.71028600  |
| H  | -0.19647000 | 5.06619800  | 0.22967400  |
| H  | -1.47878900 | 5.12552300  | -1.00255000 |
| Cl | 5.70480000  | -0.75461400 | 0.00127300  |
| H  | 3.82016800  | -0.54459900 | -2.15515600 |

## 2-[Bis(acetoxy)iodo]pyridine radical anion

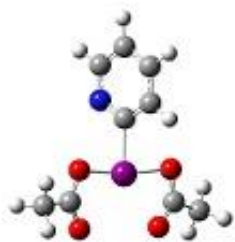

Gibbs Free Energy (hartrees):  
B3LYP/6-31+G(d,p) MeCN = -716.080639

|   |             |             |             |
|---|-------------|-------------|-------------|
| I | 0.21861400  | -0.45286200 | -0.01189300 |
| C | -0.49642200 | 1.53809000  | -0.00614500 |
| C | -0.70393800 | 2.18315200  | 1.21739500  |
| C | -1.17378000 | 3.49691700  | 1.17779600  |
| C | -1.40866100 | 4.09746000  | -0.06124500 |
| C | -1.16163700 | 3.35524800  | -1.21742400 |
| O | -2.50327700 | -1.03161600 | 0.03851600  |
| O | 2.90086200  | 0.45254700  | -0.01620800 |
| C | -2.61537200 | -2.30717500 | 0.02715600  |
| C | 3.51508900  | -0.66758700 | -0.01647700 |
| O | -1.66913800 | -3.13062100 | 0.00892400  |
| O | 2.97210600  | -1.80220900 | -0.02715600 |
| C | -4.05641500 | -2.84072100 | 0.00105300  |
| C | 5.04864300  | -0.59639100 | 0.03162000  |
| H | -1.35190200 | 4.03861800  | 2.10166100  |
| H | -0.50951100 | 1.68107500  | 2.15763900  |
| H | 5.48175900  | -1.39764700 | -0.57275700 |
| H | 5.41795300  | 0.37310100  | -0.30916300 |
| H | 5.37119800  | -0.74525000 | 1.06862900  |
| H | -4.11507300 | -3.79832000 | 0.52438300  |
| H | -4.75695000 | -2.12752800 | 0.44102800  |
| H | -4.34625600 | -3.00586500 | -1.04321100 |
| H | -1.77331300 | 5.11644700  | -0.13445200 |
| H | -1.32892900 | 3.78347300  | -2.20216500 |
| N | -0.70928200 | 2.08926100  | -1.19375100 |

## 3-[Bis(acetoxy)iodo]pyridine radical anion

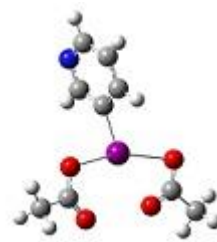

Gibbs Free Energy (hartrees):  
B3LYP/6-31+G(d,p) MeCN = -716.078415

|   |             |             |             |
|---|-------------|-------------|-------------|
| I | -0.34851300 | -0.11846000 | -0.01404300 |
| C | 1.61420900  | -0.87581500 | 0.01726600  |
| C | 2.27523000  | -1.12207500 | 1.22411400  |
| C | 3.57000000  | -1.64004200 | 1.17725600  |
| C | 4.14500100  | -1.89524000 | -0.06998300 |
| O | 1.02351400  | 2.19963300  | -0.02934300 |
| O | -2.59606200 | -2.18779000 | 0.03449000  |
| C | 0.22145300  | 3.20535000  | 0.02635500  |
| C | -3.44819800 | -1.24897100 | -0.00950800 |
| O | -1.02201000 | 3.15436800  | 0.09667200  |
| O | -3.16850300 | -0.01377400 | -0.06863000 |
| C | 0.91920000  | 4.57268500  | -0.02945600 |
| C | -4.93358700 | -1.63165600 | 0.03601500  |
| H | 4.12254500  | -1.84335300 | 2.08884900  |
| H | 1.79809600  | -0.91413100 | 2.17639000  |
| H | -5.49521700 | -1.05376900 | -0.70398700 |
| H | -5.07947800 | -2.69991100 | -0.13838100 |
| H | -5.33461600 | -1.37873100 | 1.02441300  |
| H | 0.42856200  | 5.26020800  | 0.66417300  |
| H | 1.98301600  | 4.49933900  | 0.20238400  |
| H | 0.80659000  | 4.97398300  | -1.04261800 |
| H | 5.15099600  | -2.30165300 | -0.14007800 |
| N | 3.51460900  | -1.66680900 | -1.23370900 |
| C | 2.27177500  | -1.16805000 | -1.18486300 |
| H | 1.78239200  | -0.99255600 | -2.13959000 |

**4-[Bis(acetoxy)iodo]pyridine  
radical anion**

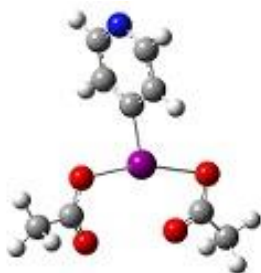

Gibbs Free Energy (hartrees):  
B3LYP/6-31+G(d,p) MeCN = -716.078117

|   |             |             |             |
|---|-------------|-------------|-------------|
| I | 0.36284000  | -0.10537100 | -0.01139400 |
| C | -1.60077100 | -0.87991300 | 0.00219200  |
| C | -2.26275600 | -1.11750500 | 1.20885100  |
| C | -3.55511100 | -1.64807500 | 1.16002700  |
| C | -3.54165900 | -1.71787800 | -1.12979300 |
| C | -2.24886000 | -1.19005700 | -1.19546700 |
| O | 2.58545800  | -2.16285100 | 0.02629300  |
| O | -1.05147800 | 2.18438000  | -0.04336300 |
| C | 3.44754300  | -1.23208300 | -0.00925400 |
| C | -0.25452100 | 3.19393600  | 0.01916700  |
| O | 3.17967600  | 0.00585100  | -0.05468800 |
| O | 0.98835600  | 3.14916100  | 0.09873000  |
| C | 4.92824200  | -1.63188400 | 0.02849700  |
| C | -0.95914000 | 4.55763500  | -0.04017900 |
| H | -4.09562000 | -1.83980000 | 2.08415800  |
| H | -1.80254700 | -0.89887600 | 2.16624900  |
| H | -1.77750000 | -1.02945600 | -2.15891700 |
| H | -4.07113400 | -1.96590100 | -2.04689400 |
| H | -0.48206900 | 5.24372100  | 0.66423200  |
| H | -0.83339300 | 4.96462000  | -1.04945300 |
| H | -2.02567400 | 4.47739200  | 0.17597600  |
| H | 5.33622700  | -1.38722600 | 1.01604600  |
| H | 5.06116700  | -2.70089600 | -0.15112500 |
| H | 5.49256700  | -1.05716500 | -0.71190100 |
| N | -4.19520200 | -1.94844400 | 0.01935500  |

**[Bis(acetoxy)iodo]-4-trichloromethylbenzene  
radical anion**

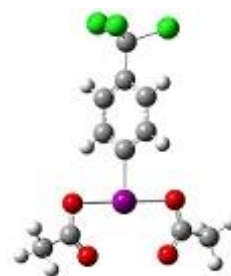

Gibbs Free Energy (hartrees):  
B3LYP/6-31+G(d,p) MeCN = -2118.109406

|    |             |             |             |
|----|-------------|-------------|-------------|
| I  | -2.16622800 | -0.00623600 | -0.00659400 |
| C  | -0.07395600 | -0.02397400 | 0.02218300  |
| C  | 0.64121500  | 0.00576700  | -1.18290100 |
| C  | 2.03182200  | -0.01586800 | -1.16024300 |
| C  | 2.72813000  | -0.07036000 | 0.05997700  |
| C  | 2.00482500  | -0.10088100 | 1.25678600  |
| C  | 0.60713400  | -0.07831200 | 1.23959000  |
| O  | -2.37875200 | -2.84120600 | -0.02827300 |
| O  | -1.95489000 | 2.77170000  | 0.01897000  |
| C  | -3.65201800 | -2.92954100 | -0.02338800 |
| C  | -3.17195800 | 3.16901100  | 0.00541700  |
| O  | -4.45356900 | -1.95820300 | -0.04071100 |
| O  | -4.18563400 | 2.42937500  | -0.02303700 |
| C  | -4.23636700 | -4.34807300 | 0.03896100  |
| C  | -3.35721500 | 4.69377000  | 0.04151000  |
| H  | 2.57249100  | 0.00906700  | -2.10031200 |
| H  | 0.12336700  | 0.04631800  | -2.13471700 |
| H  | 0.06574500  | -0.10314900 | 2.17879800  |
| H  | 2.51334800  | -0.14244500 | 2.21141200  |
| H  | -4.40734500 | 4.95995000  | -0.09296300 |
| H  | -3.00927600 | 5.07740300  | 1.00662200  |
| H  | -2.75207500 | 5.16683600  | -0.73756200 |
| H  | -5.12462200 | -4.41708600 | -0.59461800 |
| H  | -3.50317400 | -5.09995600 | -0.25986400 |
| H  | -4.54442000 | -4.55245700 | 1.07085700  |
| C  | 4.24769600  | -0.09218900 | 0.02089700  |
| Cl | 5.01153300  | -0.17988500 | 1.64746300  |
| Cl | 4.87047500  | 1.40897500  | -0.80029100 |
| Cl | 4.82639900  | -1.52811400 | -0.93696500 |

**[Bis(acetoxy)iodo]-4-trifluoromethylbenzene  
radical anion**

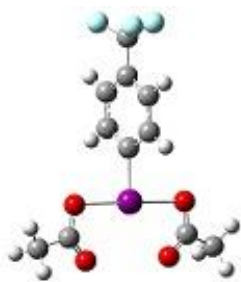

Gibbs Free Energy (hartrees):

B3LYP/6-31+G(d,p) MeCN = -1037.088246

|   |             |             |             |
|---|-------------|-------------|-------------|
| I | 1.48813600  | -0.00596900 | -0.03790600 |
| C | -0.60720100 | -0.01629500 | -0.01855700 |
| C | -1.29016100 | -0.02230800 | 1.20335600  |
| C | -2.68542200 | -0.03786300 | 1.21472700  |
| C | -3.39160100 | -0.04533700 | 0.00689200  |
| C | -2.70701700 | -0.04319300 | -1.21409000 |
| C | -1.31236500 | -0.02777800 | -1.22834400 |
| O | 1.72386800  | -2.84581000 | 0.01951200  |
| O | 1.36839200  | 2.78333600  | 0.00088400  |
| C | 2.99787800  | -2.91647600 | 0.01060400  |
| C | 2.60613100  | 3.10610500  | 0.00507500  |
| O | 3.78559000  | -1.93500300 | -0.04538000 |
| O | 3.57367500  | 2.30638400  | -0.04139900 |
| C | 3.60457500  | -4.32395600 | 0.10511600  |
| C | 2.90476600  | 4.60936500  | 0.10752100  |
| H | -3.21406800 | -0.03921600 | 2.16161800  |
| H | -0.74690100 | -0.01300600 | 2.14169300  |
| H | -0.78604000 | -0.02264100 | -2.17631200 |
| H | -3.25277000 | -0.04845700 | -2.15152200 |
| H | 3.77487000  | 4.86110000  | -0.50430300 |
| H | 2.04642800  | 5.21346700  | -0.19327200 |
| H | 3.14694000  | 4.84436900  | 1.15035800  |
| H | 4.47070000  | -4.40417400 | -0.55733600 |
| H | 3.95302800  | -4.48511900 | 1.13172900  |
| H | 2.87294100  | -5.09648000 | -0.13984600 |
| C | -4.89429700 | -0.11354800 | 0.01543800  |
| F | -5.43504700 | 0.41427100  | 1.14191200  |
| F | -5.45006700 | 0.54316500  | -1.03497300 |
| F | -5.34825000 | -1.39932800 | -0.05906600 |

**[Bis(acetoxy)iodo]-4-trifluoro(methylsulfonyl)benzene  
radical anion**

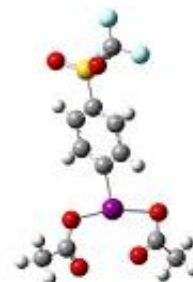

Gibbs Free Energy (hartrees):

B3LYP/6-31+G(d,p) MeCN = -1585.637591

|   |             |             |             |
|---|-------------|-------------|-------------|
| I | -2.27804100 | -0.13843000 | -0.00125700 |
| C | -0.18982100 | 0.14948300  | 0.00303300  |
| C | 0.49919200  | 0.24684000  | -1.21308700 |
| C | 1.88369200  | 0.41286300  | -1.21704400 |
| C | 2.55609800  | 0.47204800  | 0.00842400  |
| C | 1.88319900  | 0.37670600  | 1.23132400  |
| C | 0.49869000  | 0.21089900  | 1.22178100  |
| O | -3.07007400 | -3.02985100 | -0.02754800 |
| O | -2.18226400 | 2.55652200  | 0.02799100  |
| C | -4.29548400 | -2.69861500 | -0.01435100 |
| C | -3.38951900 | 3.00110300  | 0.01353200  |
| O | -4.72555300 | -1.50662200 | -0.00882600 |
| O | -4.42845900 | 2.31069300  | -0.00041700 |
| C | -5.33658400 | -3.82440600 | 0.01881000  |
| C | -3.50236000 | 4.53271300  | -0.01659000 |
| H | 2.42417500  | 0.50304300  | -2.15265000 |
| H | -0.03360100 | 0.20154500  | -2.15646500 |
| H | -0.03465100 | 0.13764000  | 2.16308200  |
| H | -4.34134800 | 4.84946200  | 0.60789800  |
| H | -2.58165700 | 5.01563100  | 0.31495800  |
| H | -3.70923100 | 4.84122500  | -1.04726100 |
| H | -6.13332300 | -3.61971100 | -0.70244100 |
| H | -4.88585000 | -4.79641400 | -0.19198300 |
| H | -5.79349700 | -3.85535000 | 1.01456500  |
| H | 2.42317300  | 0.43922700  | 2.16948600  |
| S | 4.32611200  | 0.68436900  | 0.01174600  |
| O | 4.76598300  | 1.27211000  | -1.26167200 |
| O | 4.76578900  | 1.23536500  | 1.30155300  |
| C | 4.99925600  | -1.09196500 | -0.01349000 |
| F | 6.33526600  | -1.03458400 | -0.01237400 |
| F | 4.58499700  | -1.73176100 | -1.11322800 |
| F | 4.58447600  | -1.76267400 | 1.06746800  |

**[Bis(trichloroacetoxy)iodo]benzene radical anion**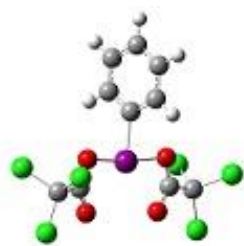

Gibbs Free Energy (hartrees):  
B3LYP/6-31+G(d,p) MeCN = -3457.603042

|    |             |             |             |
|----|-------------|-------------|-------------|
| I  | -0.00000800 | 0.15853500  | -0.06742600 |
| C  | 0.00002800  | 2.24409200  | -0.01605600 |
| C  | 0.00005100  | 2.89873600  | 1.22190800  |
| C  | 0.00007600  | 4.29553000  | 1.24727600  |
| C  | 0.00007600  | 5.02334600  | 0.05224700  |
| C  | 0.00005200  | 4.35515200  | -1.17707600 |
| C  | 0.00002700  | 2.95878700  | -1.22032200 |
| O  | -2.80267000 | 0.28523400  | -0.02913100 |
| O  | 2.80264300  | 0.28519600  | -0.02915700 |
| C  | -3.18668200 | -0.91496200 | -0.04153900 |
| C  | 3.18666000  | -0.91499900 | -0.04154200 |
| O  | -2.53292100 | -1.96341600 | -0.09011800 |
| O  | 2.53290400  | -1.96345800 | -0.09009000 |
| C  | -4.78371700 | -1.04472900 | 0.02136700  |
| C  | 4.78369600  | -1.04475700 | 0.02136300  |
| H  | 0.00009500  | 6.10868600  | 0.07892100  |
| H  | 0.00009400  | 4.81111500  | 2.20271900  |
| H  | 0.00005100  | 2.33511300  | 2.14828600  |
| H  | 0.00000900  | 2.44125800  | -2.17321200 |
| H  | 0.00005200  | 4.91711600  | -2.10600000 |
| Cl | -5.37399200 | -0.28280500 | 1.55172700  |
| Cl | -5.33256800 | -2.75401500 | -0.01509600 |
| Cl | -5.50510800 | -0.17788600 | -1.39177700 |
| Cl | 5.37395100  | -0.28287900 | 1.55175400  |
| Cl | 5.33255700  | -2.75403900 | -0.01515200 |
| Cl | 5.50509400  | -0.17786400 | -1.39174500 |

**[Bis(trifluoroacetoxy)iodo]benzene radical anion**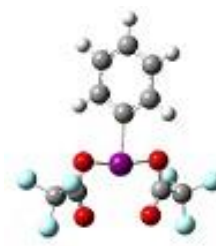

Gibbs Free Energy (hartrees):  
B3LYP/6-31+G(d,p) MeCN = -1295.553503

|   |             |             |             |
|---|-------------|-------------|-------------|
| I | 0.00000200  | -0.07421100 | -0.00000100 |
| C | -0.00000400 | 2.01258200  | -0.00000100 |
| C | 0.00001200  | 2.69760200  | 1.22141500  |
| C | 0.00000900  | 4.09460600  | 1.21252100  |
| C | -0.00001000 | 4.79284300  | 0.00000000  |
| C | -0.00002600 | 4.09460700  | -1.21252000 |
| C | -0.00002300 | 2.69760300  | -1.22141600 |
| O | -2.81980200 | 0.04620100  | 0.00000800  |
| O | 2.81980500  | 0.04620700  | -0.00000500 |
| C | -3.17935500 | -1.16373400 | 0.00000400  |
| C | 3.17935900  | -1.16372800 | -0.00000700 |
| O | -2.50591200 | -2.20547600 | 0.00000100  |
| O | 2.50591500  | -2.20547000 | -0.00001100 |
| C | -4.74313800 | -1.32319700 | 0.00000200  |
| C | 4.74314100  | -1.32319200 | 0.00000000  |
| H | -0.00001200 | 5.87851000  | 0.00000100  |
| H | 0.00002200  | 4.63350300  | 2.15501700  |
| H | 0.00002600  | 2.15699800  | 2.16142200  |
| H | -0.00003500 | 2.15700000  | -2.16142300 |
| H | -0.00004100 | 4.63350400  | -2.15501700 |
| F | 5.29813600  | -0.73505400 | -1.09204900 |
| F | 5.29812000  | -0.73509200 | 1.09207700  |
| F | 5.14690500  | -2.61173300 | -0.00001900 |
| F | -5.14690200 | -2.61173800 | -0.00000600 |
| F | -5.29812400 | -0.73507200 | -1.09205700 |
| F | -5.29812500 | -0.73508500 | 1.09206800  |

# [Bis(benzoyloxy)iodo]benzene radical anion

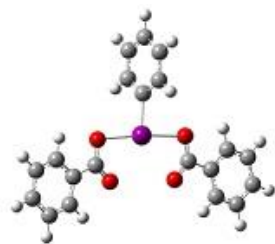

Gibbs Free Energy (hartrees):

B3LYP/6-31+G(d,p) MeCN = -1083.425905

|   |             |             |             |   |             |             |             |
|---|-------------|-------------|-------------|---|-------------|-------------|-------------|
| I | -0.03059900 | 0.46032400  | -0.00001800 | C | -5.56601300 | -0.40394700 | -0.00001000 |
| C | 0.12177200  | 2.54915100  | 0.00000000  | C | -6.10508700 | -3.14638700 | 0.00003300  |
| C | 0.17027500  | 3.23964400  | 1.21819100  | H | -3.95617500 | -3.39529900 | 0.00002200  |
| C | 0.27081500  | 4.63366600  | 1.21154300  | C | -6.88890400 | -0.85553600 | 0.00000600  |
| C | 0.32138800  | 5.33170800  | 0.00002600  | H | -5.34609600 | 0.65832200  | -0.00002700 |
| C | 0.27084900  | 4.63368600  | -1.21150300 | C | -7.16184700 | -2.22837600 | 0.00002700  |
| C | 0.17030900  | 3.23966400  | -1.21817800 | H | -6.31125300 | -4.21329800 | 0.00005000  |
| O | -2.87779600 | 0.42659800  | -0.00003100 | H | -7.70536400 | -0.13848300 | 0.00000100  |
| O | 2.76669700  | 0.26241700  | 0.00001900  | H | -8.18989400 | -2.58008800 | 0.00003900  |
| C | -3.05431400 | -0.83690700 | -0.00002300 |   |             |             |             |
| C | 2.93437900  | -1.00436400 | 0.00001100  |   |             |             |             |
| O | -2.14086900 | -1.70353600 | -0.00002900 |   |             |             |             |
| O | 2.01797700  | -1.86475900 | 0.00000000  |   |             |             |             |
| H | 0.39929800  | 6.41473000  | 0.00003600  |   |             |             |             |
| H | 0.30942700  | 5.17080500  | 2.15458200  |   |             |             |             |
| H | 0.13112400  | 2.70123200  | 2.15918200  |   |             |             |             |
| H | 0.13118400  | 2.70126800  | -2.15917900 |   |             |             |             |
| H | 0.30948700  | 5.17084000  | -2.15453300 |   |             |             |             |
| C | 4.38074100  | -1.48844500 | 0.00001000  |   |             |             |             |
| C | 4.65766600  | -2.86397100 | 0.00000900  |   |             |             |             |
| C | 5.44809900  | -0.57731100 | 0.00000800  |   |             |             |             |
| C | 5.97823400  | -3.32161400 | 0.00000600  |   |             |             |             |
| H | 3.82855400  | -3.56369100 | 0.00001200  |   |             |             |             |
| C | 6.76946500  | -1.03328800 | 0.00000500  |   |             |             |             |
| H | 5.23201100  | 0.48570500  | 0.00001000  |   |             |             |             |
| C | 7.03791100  | -2.40698300 | 0.00000400  |   |             |             |             |
| H | 6.18093300  | -4.38916900 | 0.00000600  |   |             |             |             |
| H | 7.58820900  | -0.31887000 | 0.00000300  |   |             |             |             |
| H | 8.06480800  | -2.76200200 | 0.00000100  |   |             |             |             |
| C | -4.50146000 | -1.31828700 | -0.00000500 |   |             |             |             |
| C | -4.78304300 | -2.69292000 | 0.00001700  |   |             |             |             |

# [Bis(isonicotinoyloxy)iodo]benzene radical anion

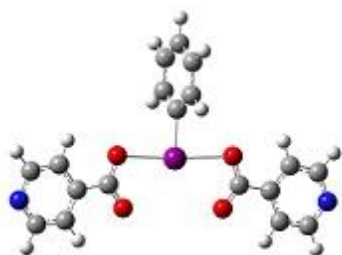

Gibbs Free Energy (hartrees):

B3LYP/6-31+G(d,p) MeCN = -1115.521900

|   |             |             |             |   |             |             |             |
|---|-------------|-------------|-------------|---|-------------|-------------|-------------|
| I | -0.0000400  | 0.13411700  | 0.00006500  | C | -5.19130700 | -2.50653400 | 0.00001600  |
| C | 0.00000000  | 2.22571100  | 0.00003500  | C | -5.58148700 | -0.14296300 | -0.00009700 |
| C | 0.00004600  | 2.91374700  | -1.21920900 | C | -6.57621200 | -2.68297900 | -0.00002600 |
| C | 0.00004900  | 4.31152000  | -1.21154600 | H | -4.52168800 | -3.35910400 | 0.00007600  |
| C | 0.00000500  | 5.01098100  | -0.00000500 | C | -6.94975600 | -0.42187900 | -0.00013600 |
| C | -0.00004100 | 4.31155500  | 1.21155500  | H | -5.22550600 | 0.88105000  | -0.00012700 |
| C | -0.00004400 | 2.91378200  | 1.21925800  | N | -7.45556000 | -1.66672800 | -0.00010200 |
| O | 2.79448300  | 0.24825000  | 0.00004700  | H | -7.00004500 | -3.68495800 | 0.00000100  |
| O | -2.79449000 | 0.24826500  | 0.00000900  | H | -7.67330000 | 0.39057400  | -0.00019700 |
| C | 3.16035200  | -0.97318700 | 0.00003700  |   |             |             |             |
| C | -3.16035200 | -0.97317400 | 0.00002600  |   |             |             |             |
| O | 2.41112300  | -1.97828900 | 0.00007300  |   |             |             |             |
| O | -2.41111800 | -1.97827200 | 0.00007600  |   |             |             |             |
| H | 0.00000700  | 6.09674500  | -0.00002100 |   |             |             |             |
| H | 0.00008500  | 4.84982700  | -2.15461500 |   |             |             |             |
| H | 0.00007900  | 2.37363400  | -2.15976400 |   |             |             |             |
| H | -0.00007900 | 2.37369600  | 2.15982900  |   |             |             |             |
| H | -0.00007500 | 4.84988900  | 2.15460900  |   |             |             |             |
| C | 4.67277300  | -1.20717200 | -0.00002500 |   |             |             |             |
| C | 5.19131500  | -2.50653600 | -0.00005200 |   |             |             |             |
| C | 5.58148200  | -0.14296300 | -0.00005900 |   |             |             |             |
| C | 6.57622100  | -2.68297300 | -0.00011000 |   |             |             |             |
| H | 4.52170100  | -3.35911000 | -0.00002800 |   |             |             |             |
| C | 6.94975300  | -0.42187200 | -0.00011600 |   |             |             |             |
| H | 5.22549600  | 0.88104800  | -0.00004000 |   |             |             |             |
| N | 7.45556400  | -1.66671800 | -0.00014200 |   |             |             |             |
| H | 7.00006000  | -3.68495000 | -0.00013200 |   |             |             |             |
| H | 7.67329200  | 0.39058500  | -0.00014200 |   |             |             |             |
| C | -4.67277200 | -1.20716800 | -0.00001900 |   |             |             |             |



**[Bis(trifluoromethylsulfonyloxy)iodo]benzene radical anion**

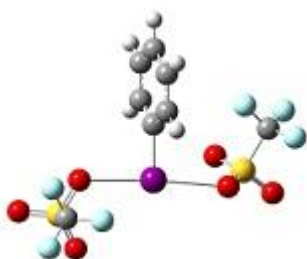

Gibbs Free Energy (hartrees):

B3LYP/6-31+G(d,p) MeCN = -2166.030872

|   |             |             |             |
|---|-------------|-------------|-------------|
| I | -0.16221400 | -0.52653000 | -0.15540900 |
| C | 0.31334700  | 1.47655900  | -0.20275200 |
| C | 0.24007000  | 2.22604900  | 0.98545400  |
| C | 0.56630300  | 3.57902600  | 0.94374800  |
| C | 0.96046500  | 4.17263300  | -0.26378200 |
| C | 1.02993900  | 3.41395300  | -1.44047900 |
| C | 0.70872500  | 2.05901800  | -1.42067100 |
| O | -2.85796600 | 0.28181800  | -0.81805500 |
| O | 2.44537600  | -1.55433000 | 0.62634300  |
| H | 1.21384000  | 5.22779900  | -0.28747900 |
| H | 0.51365200  | 4.17038000  | 1.85205800  |
| H | -0.06500900 | 1.76070200  | 1.91570300  |
| H | 0.76187200  | 1.46647100  | -2.32677100 |
| H | 1.33541700  | 3.87764100  | -2.37277400 |
| S | -4.03756900 | -0.63796600 | -0.73505000 |
| S | 3.70067400  | -1.52456400 | -0.19043000 |
| O | -5.11543700 | -0.31454400 | -1.69519300 |
| O | -3.68815700 | -2.06880500 | -0.60195900 |
| O | 3.50732800  | -1.14618700 | -1.60692700 |
| O | 4.60346100  | -2.67035200 | 0.05916700  |
| C | -4.78630300 | -0.20378600 | 0.93315700  |
| C | 4.63142100  | -0.06244600 | 0.53694000  |
| F | 3.91843700  | 1.07235800  | 0.40868900  |
| F | 4.88086800  | -0.25350900 | 1.84632400  |
| F | 5.80975900  | 0.11096100  | -0.09193300 |
| F | -5.14763700 | 1.09243700  | 0.97536300  |
| F | -5.88051700 | -0.95141200 | 1.17127200  |
| F | -3.90454900 | -0.42453200 | 1.92661100  |

**Iodobenzene**

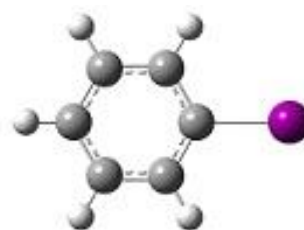

Gibbs Free Energy (hartrees):

B3LYP/6-31+G(d,p) MeCN = -243.020904

|   |             |             |             |
|---|-------------|-------------|-------------|
| I | -1.55653000 | 0.00000000  | -0.00000100 |
| C | 0.56258700  | 0.00000000  | -0.00001000 |
| C | 1.24940400  | -1.21662000 | 0.00000900  |
| C | 2.64925100  | -1.20909800 | 0.00000700  |
| C | 3.35118800  | 0.00000000  | -0.00002100 |
| C | 2.64925100  | 1.20909800  | 0.00000700  |
| C | 1.24940400  | 1.21662000  | 0.00000900  |
| H | 4.43697500  | 0.00000000  | -0.00003800 |
| H | 3.18512300  | -2.15388500 | 0.00001500  |
| H | 0.71119000  | -2.15828000 | 0.00003400  |
| H | 0.71118900  | 2.15828000  | 0.00003400  |
| H | 3.18512300  | 2.15388500  | 0.00001500  |

### 4-Cyanoiodobenzene

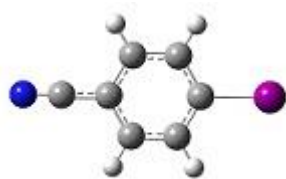

Gibbs Free Energy (hartrees):  
B3LYP/6-31+G(d,p) MeCN = -335.270777

|   |             |             |            |
|---|-------------|-------------|------------|
| I | 0.00000000  | -2.17168900 | 0.00000000 |
| C | 0.00000000  | -0.06470000 | 0.00000000 |
| C | -1.21713800 | 0.62452800  | 0.00000000 |
| C | -1.21840100 | 2.01844600  | 0.00000000 |
| C | 0.00000000  | 2.72018300  | 0.00000000 |
| C | 1.21840200  | 2.01844600  | 0.00000000 |
| C | 1.21713800  | 0.62452800  | 0.00000000 |
| H | -2.15910700 | 2.55847900  | 0.00000000 |
| H | -2.15944300 | 0.08878500  | 0.00000000 |
| H | 2.15944300  | 0.08878500  | 0.00000000 |
| H | 2.15910700  | 2.55847900  | 0.00000000 |
| C | 0.00000000  | 4.15410800  | 0.00000000 |
| N | -0.00000100 | 5.31882500  | 0.00000000 |

### 4-Fluoriodobenzene

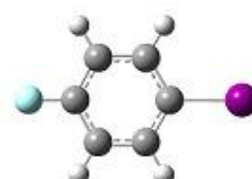

Gibbs Free Energy (hartrees):  
B3LYP/6-31+G(d,p) MeCN = -342.269046

|   |            |             |             |
|---|------------|-------------|-------------|
| I | 0.00000000 | 0.00000000  | 1.92288400  |
| C | 0.00000000 | 0.00000000  | -0.19116200 |
| C | 0.00000000 | 1.21551400  | -0.88119000 |
| C | 0.00000000 | 1.21886500  | -2.27993100 |
| C | 0.00000000 | 0.00000000  | -2.94567600 |
| C | 0.00000000 | -1.21886500 | -2.27993100 |
| C | 0.00000000 | -1.21551400 | -0.88119000 |
| H | 0.00000000 | 2.14899800  | -2.83791900 |
| H | 0.00000000 | 2.15905000  | -0.34710800 |
| H | 0.00000000 | -2.15905000 | -0.34710800 |
| H | 0.00000000 | -2.14899800 | -2.83791900 |
| F | 0.00000000 | 0.00000000  | -4.30981400 |

### 4-Methyliodobenzene

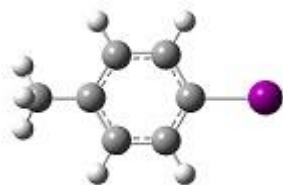

Gibbs Free Energy (hartrees):  
B3LYP/6-31+G(d,p) MeCN = -282.317780

|   |             |             |             |
|---|-------------|-------------|-------------|
| I | 1.95868500  | 0.00000000  | 0.00221000  |
| C | -0.15989800 | 0.00000000  | -0.00157800 |
| C | -0.85223400 | -1.21235300 | -0.00528100 |
| C | -2.25100500 | -1.20184900 | -0.01071400 |
| C | -2.97485600 | 0.00000200  | -0.01024400 |
| C | -2.25100500 | 1.20185300  | -0.01028600 |
| C | -0.85223300 | 1.21235500  | -0.00485000 |
| H | -2.78237800 | -2.15031600 | -0.01721900 |
| H | -0.31972900 | -2.15745400 | -0.00754200 |
| H | -0.31972900 | 2.15745700  | -0.00677600 |
| H | -2.78237900 | 2.15032200  | -0.01645400 |
| C | -4.48567600 | -0.00000300 | 0.01611400  |
| H | -4.85854800 | -0.00021900 | 1.04811800  |
| H | -4.89305600 | 0.88713600  | -0.47792300 |
| H | -4.89305700 | -0.88693500 | -0.47829300 |

### 4-Nitroiodobenzene

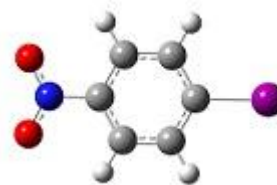

Gibbs Free Energy (hartrees):  
B3LYP/6-31+G(d,p) MeCN = -447.532541

|   |             |             |            |
|---|-------------|-------------|------------|
| I | 0.00000000  | 2.53771100  | 0.00000000 |
| C | 0.00000000  | 0.43529200  | 0.00000000 |
| C | 1.21835100  | -0.25457300 | 0.00000000 |
| C | 1.22137300  | -1.64789200 | 0.00000000 |
| C | 0.00000000  | -2.32478200 | 0.00000000 |
| C | -1.22137300 | -1.64789200 | 0.00000000 |
| C | -1.21835100 | -0.25457300 | 0.00000000 |
| H | 2.15309900  | -2.19947400 | 0.00000000 |
| H | 2.16038900  | 0.28117600  | 0.00000000 |
| H | -2.16038900 | 0.28117600  | 0.00000000 |
| H | -2.15309900 | -2.19947400 | 0.00000000 |
| N | 0.00000000  | -3.78814200 | 0.00000000 |
| O | -1.08815800 | -4.37366200 | 0.00000000 |
| O | 1.08815800  | -4.37366200 | 0.00000000 |

### 4-Methoxyiodobenzene

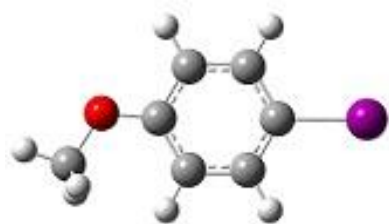

Gibbs Free Energy (hartrees):  
B3LYP/6-31+G(d,p) MeCN = -357.521094

|   |             |             |             |
|---|-------------|-------------|-------------|
| I | 2.31715100  | -0.07872200 | 0.00000000  |
| C | 0.20615100  | 0.07444900  | 0.00000000  |
| C | -0.57496000 | -1.07920100 | 0.00000000  |
| C | -1.97305800 | -0.98314300 | 0.00000000  |
| C | -2.58469800 | 0.27758400  | 0.00000000  |
| C | -1.78908200 | 1.43520700  | 0.00000000  |
| C | -0.39983500 | 1.33643900  | 0.00000000  |
| H | -2.55898300 | -1.89425100 | 0.00000000  |
| H | -0.11520900 | -2.06167900 | 0.00000000  |
| H | 0.19879200  | 2.24097300  | 0.00000000  |
| H | -2.27147300 | 2.40768200  | 0.00000000  |
| O | -3.93387500 | 0.48187000  | 0.00000000  |
| C | -4.79889500 | -0.65768500 | 0.00000000  |
| H | -4.64582600 | -1.26932800 | 0.89614900  |
| H | -5.81319800 | -0.25864300 | 0.00000000  |
| H | -4.64582600 | -1.26932800 | -0.89614900 |

### 2-Chloriodobenzene

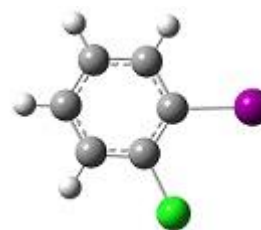

Gibbs Free Energy (hartrees):  
B3LYP/6-31+G(d,p) MeCN = -702.619298

|    |             |             |             |
|----|-------------|-------------|-------------|
| I  | 1.66510000  | -0.23970200 | 0.00000000  |
| C  | -0.43408500 | -0.42687300 | -0.00000400 |
| C  | -0.98407400 | -1.71518700 | 0.00000000  |
| C  | -2.36839700 | -1.89557600 | 0.00000100  |
| C  | -3.21782300 | -0.78621600 | 0.00000100  |
| C  | -2.68096800 | 0.50095900  | 0.00000000  |
| C  | -1.29291900 | 0.68053200  | -0.00000400 |
| H  | -2.77585400 | -2.90159700 | 0.00000400  |
| H  | -0.32719900 | -2.57802600 | 0.00000200  |
| H  | -4.29532200 | -0.91650200 | 0.00000300  |
| H  | -3.32851800 | 1.37101700  | 0.00000200  |
| Cl | -0.68551700 | 2.32843900  | 0.00000100  |

### 3-Chloriodobenzene

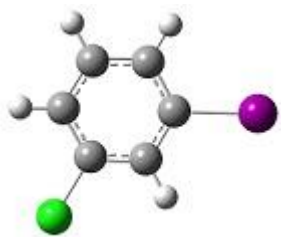

Gibbs Free Energy (hartrees):  
B3LYP/6-31+G(d,p) MeCN = -702.622968

|    |             |             |            |
|----|-------------|-------------|------------|
| I  | -2.09918700 | 0.16267900  | 0.00000000 |
| C  | 0.00000000  | 0.40702300  | 0.00000000 |
| C  | 0.54656800  | 1.69250200  | 0.00000000 |
| C  | 1.93728600  | 1.83926600  | 0.00000000 |
| C  | 2.77780200  | 0.72331100  | 0.00000000 |
| C  | 2.19996100  | -0.54613200 | 0.00000000 |
| C  | 0.81499600  | -0.72767800 | 0.00000000 |
| H  | 2.36980800  | 2.83506500  | 0.00000000 |
| H  | -0.09233500 | 2.56826900  | 0.00000000 |
| H  | 0.39506400  | -1.72628200 | 0.00000000 |
| Cl | 3.23934000  | -1.96861800 | 0.00000000 |
| H  | 3.85588100  | 0.83771000  | 0.00000000 |

### 4-Chloriodobenzene

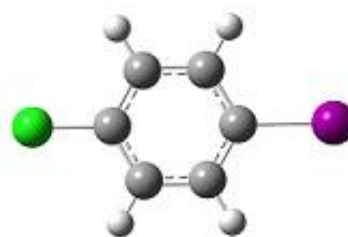

Gibbs Free Energy (hartrees):  
B3LYP/6-31+G(d,p) MeCN = -702.622529

|    |            |             |             |
|----|------------|-------------|-------------|
| I  | 0.00000000 | 0.00000000  | 2.30091000  |
| C  | 0.00000000 | 0.00000000  | 0.18839800  |
| C  | 0.00000000 | 1.21381400  | -0.50299200 |
| C  | 0.00000000 | 1.21576100  | -1.90129500 |
| C  | 0.00000000 | 0.00000000  | -2.58513700 |
| C  | 0.00000000 | -1.21576100 | -1.90129500 |
| C  | 0.00000000 | -1.21381400 | -0.50299200 |
| H  | 0.00000000 | 2.15501600  | -2.44351800 |
| H  | 0.00000000 | 2.15874700  | 0.02887000  |
| H  | 0.00000000 | -2.15874700 | 0.02887000  |
| H  | 0.00000000 | -2.15501600 | -2.44351800 |
| Cl | 0.00000000 | 0.00000000  | -4.34629600 |

## 2-Iodopyridine

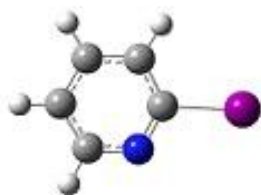

Gibbs Free Energy (hartrees):  
B3LYP/6-31+G(d,p) MeCN = -259.071152

|   |             |             |            |
|---|-------------|-------------|------------|
| I | -0.01759200 | -1.54182700 | 0.00000000 |
| C | 0.00000000  | 0.59171200  | 0.00000000 |
| C | 1.22959600  | 1.25766400  | 0.00000000 |
| C | 1.19809300  | 2.65284000  | 0.00000000 |
| C | -0.03620500 | 3.30871500  | 0.00000000 |
| C | -1.19589200 | 2.53553700  | 0.00000000 |
| H | 2.12681700  | 3.21534600  | 0.00000000 |
| H | 2.16602500  | 0.71309100  | 0.00000000 |
| H | -0.10045800 | 4.39148300  | 0.00000000 |
| H | -2.17870000 | 2.99918400  | 0.00000000 |
| N | -1.17926500 | 1.18841400  | 0.00000000 |

## 3-Iodopyridine

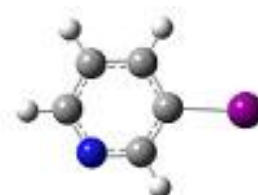

Gibbs Free Energy (hartrees):  
B3LYP/6-31+G(d,p) MeCN = -259.068477

|   |             |             |            |
|---|-------------|-------------|------------|
| I | -0.04705400 | -1.54229900 | 0.00000000 |
| C | 0.00000000  | 0.56576400  | 0.00000000 |
| C | -1.18138900 | 1.30768900  | 0.00000000 |
| C | -1.08236200 | 2.70079200  | 0.00000000 |
| C | 0.18560800  | 3.28475400  | 0.00000000 |
| C | 1.22883300  | 1.23378700  | 0.00000000 |
| H | -1.97398700 | 3.31937100  | 0.00000000 |
| H | -2.15139000 | 0.82240600  | 0.00000000 |
| H | 2.16356100  | 0.67976500  | 0.00000000 |
| H | 0.29578400  | 4.36626700  | 0.00000000 |
| N | 1.32225000  | 2.57104600  | 0.00000000 |

### 4-Iodopyridine

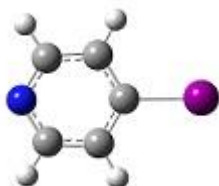

Gibbs Free Energy (hartrees):  
B3LYP/6-31+G(d,p) MeCN = -259.068840

|   |            |             |             |
|---|------------|-------------|-------------|
| I | 0.00000000 | 1.54746100  | 0.00000000  |
| C | 0.00000000 | -0.56038500 | 0.00000000  |
| C | 0.00000000 | -1.26459900 | 1.20388400  |
| C | 0.00000000 | -2.66183400 | 1.14393500  |
| C | 0.00000000 | -2.66183400 | -1.14393500 |
| C | 0.00000000 | -1.26459900 | -1.20388400 |
| H | 0.00000000 | -3.23775200 | 2.06651900  |
| H | 0.00000000 | -0.76243100 | 2.16442300  |
| H | 0.00000000 | -0.76243100 | -2.16442300 |
| H | 0.00000000 | -3.23775200 | -2.06651900 |
| N | 0.00000000 | -3.36221900 | 0.00000000  |

### 4-trichloromethyliodobenzene

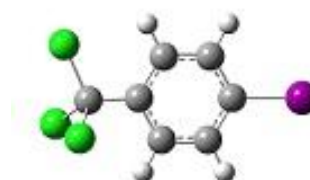

Gibbs Free Energy (hartrees):  
B3LYP/6-31+G(d,p) MeCN = -1661.098115

|    |             |             |             |
|----|-------------|-------------|-------------|
| I  | -3.60014600 | -0.00364700 | 0.00002300  |
| C  | -1.49165600 | 0.02491900  | -0.00138600 |
| C  | -0.78206800 | -1.18098500 | -0.00194300 |
| C  | 0.60992300  | -1.15853300 | -0.00329700 |
| C  | 1.30918400  | 0.06033700  | -0.00460700 |
| C  | 0.58594200  | 1.25689200  | -0.00320500 |
| C  | -0.81312700 | 1.24192400  | -0.00172300 |
| H  | 1.14765900  | -2.10069800 | -0.00361100 |
| H  | -1.30057200 | -2.13303400 | -0.00153800 |
| H  | -1.35261600 | 2.18227000  | -0.00107300 |
| H  | 1.09426100  | 2.21264100  | -0.00324000 |
| C  | 2.82805800  | 0.02039000  | -0.00102900 |
| Cl | 3.59362400  | 1.64871200  | -0.03442700 |
| Cl | 3.43550500  | -0.90162700 | -1.44917500 |
| Cl | 3.42625200  | -0.83870500 | 1.49015300  |

### 4-trifluoromethyliodobenzene

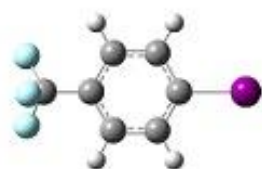

Gibbs Free Energy (hartrees):  
B3LYP/6-31+G(d,p) MeCN = -580.079886

|   |             |             |             |
|---|-------------|-------------|-------------|
| I | 2.89664700  | -0.00070200 | 0.00586900  |
| C | 0.78690600  | 0.00125600  | -0.01010200 |
| C | 0.09624200  | -1.21380600 | -0.01635800 |
| C | -1.29964100 | -1.20998600 | -0.02857600 |
| C | -1.99557500 | 0.00376000  | -0.03778800 |
| C | -1.29793600 | 1.21586200  | -0.02846800 |
| C | 0.09843800  | 1.21707200  | -0.01629300 |
| H | -1.83594800 | -2.15289600 | -0.03630900 |
| H | 0.62974800  | -2.15744400 | -0.01373700 |
| H | 0.63336200  | 2.15991000  | -0.01356600 |
| H | -1.83258100 | 2.15947100  | -0.03597100 |
| C | -3.49841200 | 0.00076900  | -0.00029600 |
| F | -4.03324900 | -1.05933900 | -0.65933400 |
| F | -3.98010800 | -0.06633100 | 1.27632000  |
| F | -4.03742300 | 1.11884700  | -0.54856100 |

### 4-(trifluoromethylsulfonyl)iodobenzene

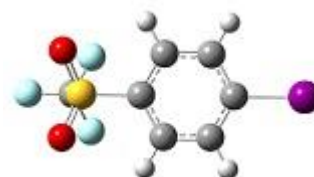

Gibbs Free Energy (hartrees):  
B3LYP/6-31+G(d,p) MeCN = -1128.628190

|   |             |             |             |
|---|-------------|-------------|-------------|
| I | 3.80458200  | 0.16640600  | -0.00027000 |
| C | 1.72477300  | -0.14572300 | -0.00009000 |
| C | 1.04505400  | -0.24991700 | -1.21897100 |
| C | -0.33398400 | -0.45800300 | -1.22290100 |
| C | -1.00544800 | -0.55600100 | 0.00014500  |
| C | -0.33382600 | -0.45765100 | 1.22307600  |
| C | 1.04521200  | -0.24956600 | 1.21890800  |
| H | -0.86969200 | -0.55199600 | -2.16084300 |
| H | 1.57625300  | -0.17638700 | -2.16079300 |
| H | 1.57653200  | -0.17576500 | 2.16064000  |
| H | -0.86941200 | -0.55137400 | 2.16111500  |
| S | -2.76567400 | -0.83228600 | 0.00029900  |
| O | -3.18323700 | -1.41802700 | -1.28149400 |
| O | -3.18307100 | -1.41765600 | 1.28231600  |
| C | -3.50706700 | 0.91662000  | 0.00009400  |
| F | -4.83964700 | 0.80725800  | 0.00019700  |
| F | -3.11822400 | 1.58729500  | -1.09051600 |
| F | -3.11808200 | 1.58761000  | 1.09045900  |



### Acetate anion

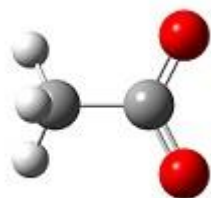

Gibbs Free Energy (hartrees):  
B3LYP/6-31+G(d,p) MeCN = -228.625438

|   |             |             |             |
|---|-------------|-------------|-------------|
| O | 0.76363300  | 1.12864000  | 0.00201700  |
| C | 0.18592600  | 0.00000000  | -0.01066200 |
| O | 0.76363500  | -1.12863800 | 0.00201700  |
| C | -1.35371600 | -0.00000100 | -0.00437000 |
| H | -1.70279100 | 0.00000700  | 1.03597100  |
| H | -1.75430900 | 0.89468300  | -0.48903200 |
| H | -1.75430800 | -0.89469200 | -0.48901900 |

### Trichloroacetate anion

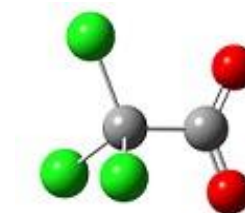

Gibbs Free Energy (hartrees):  
B3LYP/6-31+G(d,p) MeCN = -1607.427958

|    |             |             |             |
|----|-------------|-------------|-------------|
| O  | -2.10555600 | -0.81799300 | -0.00023700 |
| C  | -1.45229200 | 0.24401100  | -0.00023800 |
| O  | -1.81735900 | 1.43336900  | -0.00030700 |
| C  | 0.14325800  | 0.00063300  | -0.00001800 |
| Cl | 0.60184200  | -0.95101900 | 1.47513100  |
| Cl | 1.10402900  | 1.52732600  | -0.00053900 |
| Cl | 0.60221900  | -0.95224100 | -1.47424600 |

### Trifluoroacetate anion

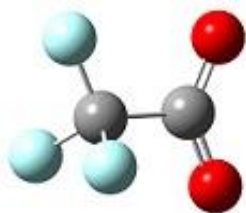

Gibbs Free Energy (hartrees):  
B3LYP/6-31+G(d,p) MeCN = -526.394013

|   |             |             |             |
|---|-------------|-------------|-------------|
| O | 1.53940600  | -1.13858800 | -0.00001800 |
| C | 1.04846200  | 0.01246600  | -0.00000100 |
| O | 1.59272400  | 1.13655700  | 0.00002000  |
| C | -0.52518600 | 0.01312800  | -0.00000100 |
| F | -1.02542000 | -0.63227900 | -1.09231500 |
| F | -1.02541600 | -0.63226000 | 1.09232600  |
| F | -1.08213000 | 1.24928200  | -0.00001100 |

### Benzoate anion

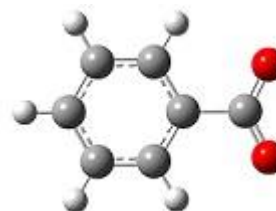

Gibbs Free Energy (hartrees):  
B3LYP/6-31+G(d,p) MeCN = -420.327325

|   |             |             |             |
|---|-------------|-------------|-------------|
| O | -2.38542000 | 1.12855800  | -0.00002200 |
| C | -1.81133300 | -0.00000700 | -0.00002400 |
| O | -2.38540700 | -1.12855900 | -0.00004400 |
| C | -0.27825200 | 0.00000800  | -0.00000300 |
| C | 0.43873000  | -1.20651400 | 0.00000300  |
| C | 0.43872900  | 1.20651800  | 0.00001100  |
| C | 1.83683800  | -1.20943100 | 0.00002100  |
| H | -0.11508500 | -2.13946400 | -0.00000700 |
| C | 1.83684700  | 1.20942700  | 0.00002800  |
| H | -0.11506100 | 2.13948200  | 0.00000700  |
| C | 2.54104600  | 0.00000100  | 0.00003300  |
| H | 2.37676200  | -2.15268500 | 0.00002500  |
| H | 2.37675600  | 2.15268800  | 0.00003800  |
| H | 3.62762700  | -0.00001400 | 0.00004700  |

### Isonicotinate anion

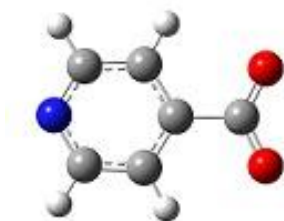

Gibbs Free Energy (hartrees):  
B3LYP/6-31+G(d,p) MeCN = -436.378014

|   |             |             |             |
|---|-------------|-------------|-------------|
| O | -2.37084100 | 1.13052800  | -0.00000400 |
| C | -1.80733700 | -0.00000500 | 0.00000200  |
| O | -2.37083400 | -1.13052900 | 0.00000000  |
| C | -0.27029700 | 0.00000900  | 0.00000100  |
| C | 0.45866400  | -1.19498300 | 0.00000200  |
| C | 0.45865700  | 1.19498800  | -0.00000100 |
| C | 1.85363800  | -1.14488200 | 0.00000100  |
| H | -0.06209600 | -2.14602700 | 0.00000400  |
| C | 1.85365200  | 1.14486700  | -0.00000100 |
| H | -0.06206800 | 2.14605000  | -0.00000200 |
| N | 2.55807800  | 0.00000400  | 0.00000000  |
| H | 2.43458100  | -2.06492500 | 0.00000200  |
| H | 2.43457400  | 2.06492600  | -0.00000300 |

### Triflate anion

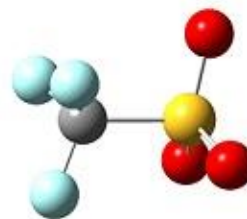

Gibbs Free Energy (hartrees):  
B3LYP/6-31+G(d,p) MeCN = -961.642985

|   |             |             |             |
|---|-------------|-------------|-------------|
| O | -1.25501800 | -0.33472300 | 1.40622300  |
| S | -0.91972500 | 0.00001800  | -0.00003800 |
| O | -1.25519500 | -1.05050300 | -0.99290300 |
| O | -1.25531400 | 1.38515100  | -0.41322900 |
| C | 0.96163500  | 0.00001900  | -0.00001300 |
| F | 1.44695600  | -1.20629900 | 0.35894400  |
| F | 1.44715600  | 0.29228500  | -1.22414500 |
| F | 1.44699900  | 0.91403700  | 0.86519600  |

### [Bis(acetoxy)iodo]benzene in water

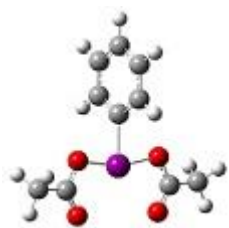

Gibbs Free Energy (hartrees):  
B3LYP/6-31+G(d,p) water = -699.867341

|   |             |             |             |
|---|-------------|-------------|-------------|
| I | 0.04830500  | -0.59862700 | 0.00000000  |
| C | -0.11856900 | 1.50017100  | 0.00000100  |
| C | -0.17249400 | 2.16934300  | -1.22265900 |
| C | -0.28513700 | 3.56328800  | -1.21281400 |
| C | -0.34137700 | 4.25701900  | 0.00000200  |
| C | -0.28513900 | 3.56328700  | 1.21281800  |
| C | -0.17249600 | 2.16934100  | 1.22266100  |
| O | 2.20022000  | -0.14643300 | 0.00000100  |
| O | -2.14725100 | -0.48968200 | -0.00000100 |
| C | 2.90006000  | -1.26024500 | 0.00000100  |
| C | -2.66466200 | -1.69912200 | -0.00000200 |
| O | 2.36609800  | -2.37617300 | 0.00000200  |
| O | -1.96320800 | -2.71808300 | -0.00000100 |
| C | 4.39867100  | -1.05208700 | -0.00000200 |
| C | -4.17741000 | -1.72699500 | -0.00000200 |
| H | -0.42899300 | 5.33908600  | 0.00000300  |
| H | -0.32856500 | 4.10042300  | -2.15511200 |
| H | -0.12877100 | 1.63008900  | -2.16227000 |
| H | -0.12877500 | 1.63008700  | 2.16227200  |
| H | -0.32856900 | 4.10042100  | 2.15511600  |
| H | -4.53185300 | -2.75806600 | -0.00000500 |
| H | -4.55636100 | -1.20382800 | 0.88282600  |
| H | -4.55636100 | -1.20382300 | -0.88282700 |
| H | 4.90922000  | -2.01542900 | 0.00002000  |
| H | 4.69164000  | -0.47640200 | -0.88286700 |
| H | 4.69164100  | -0.47635800 | 0.88283400  |

### [Bis(acetoxy)iodo]benzene in acetone

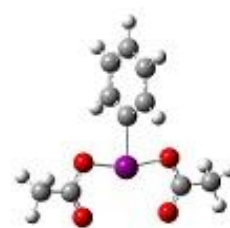

Gibbs Free Energy (hartrees):  
B3LYP/6-31+G(d,p) acetone = -699.866258

|   |             |             |             |
|---|-------------|-------------|-------------|
| I | 0.04866000  | -0.60094200 | 0.00000000  |
| C | -0.11866900 | 1.49811500  | 0.00000000  |
| C | -0.17293200 | 2.16761900  | -1.22234700 |
| C | -0.28607800 | 3.56147900  | -1.21267700 |
| C | -0.34258200 | 4.25527800  | 0.00000100  |
| C | -0.28607800 | 3.56147800  | 1.21267900  |
| C | -0.17293200 | 2.16761800  | 1.22234800  |
| O | 2.19940400  | -0.14391200 | 0.00000000  |
| O | -2.14643300 | -0.48758200 | 0.00000000  |
| C | 2.90078800  | -1.25711700 | 0.00000000  |
| C | -2.66499100 | -1.69686000 | -0.00000100 |
| O | 2.36863000  | -2.37340800 | -0.00000100 |
| O | -1.96477800 | -2.71614000 | -0.00000100 |
| C | 4.39923700  | -1.04653200 | 0.00000000  |
| C | -4.17793900 | -1.72292400 | -0.00000100 |
| H | -0.43062900 | 5.33733100  | 0.00000200  |
| H | -0.32974000 | 4.09857900  | -2.15500700 |
| H | -0.12910300 | 1.62845300  | -2.16203300 |
| H | -0.12910300 | 1.62845200  | 2.16203400  |
| H | -0.32973900 | 4.09857800  | 2.15501000  |
| H | -4.53316300 | -2.75371900 | -0.00000100 |
| H | -4.55630900 | -1.19923300 | 0.88277700  |
| H | -4.55630800 | -1.19923300 | -0.88277800 |
| H | 4.91090300  | -2.00927700 | 0.00000000  |
| H | 4.69133600  | -0.47029500 | -0.88280500 |
| H | 4.69133600  | -0.47029400 | 0.88280400  |

**[Bis(acetoxy)iodo]benzene in DCM**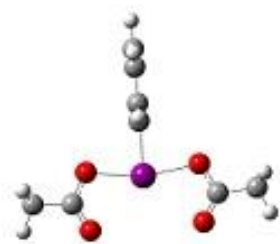

Gibbs Free Energy (hartrees):  
B3LYP/6-31+G(d,p) DCM = -699.865021

|   |             |             |             |
|---|-------------|-------------|-------------|
| I | 0.04818400  | -0.60440400 | 0.00000000  |
| C | -0.11639700 | 1.49529400  | 0.00000100  |
| C | -0.16997300 | 2.16543600  | -1.22184700 |
| C | -0.28150300 | 3.55935300  | -1.21246400 |
| C | -0.33723900 | 4.25335300  | 0.00000200  |
| C | -0.28151800 | 3.55935100  | 1.21246800  |
| C | -0.16998800 | 2.16543400  | 1.22184900  |
| O | 2.19786200  | -0.14344600 | -0.00000200 |
| O | -2.14599200 | -0.48081800 | 0.00000200  |
| C | 2.89923500  | -1.25720800 | 0.00000200  |
| C | -2.66777300 | -1.68921500 | -0.00000200 |
| O | 2.36740000  | -2.37288500 | 0.00000600  |
| O | -1.97070600 | -2.70982200 | -0.00000600 |
| C | 4.39789700  | -1.04622100 | -0.00000500 |
| C | -4.18105200 | -1.71071400 | 0.00000100  |
| H | -0.42408200 | 5.33553700  | 0.00000300  |
| H | -0.32457000 | 4.09649100  | -2.15484100 |
| H | -0.12682000 | 1.62626000  | -2.16160400 |
| H | -0.12684700 | 1.62625600  | 2.16160600  |
| H | -0.32459700 | 4.09648600  | 2.15484500  |
| H | -4.53867200 | -2.74067100 | -0.00000500 |
| H | -4.55790400 | -1.18577800 | 0.88270700  |
| H | -4.55790700 | -1.18576700 | -0.88269800 |
| H | 4.90912400  | -2.00919600 | 0.00001700  |
| H | 4.68992600  | -0.46983200 | -0.88275400 |
| H | 4.68993000  | -0.46978600 | 0.88271200  |

**[Bis(acetoxy)iodo]benzene radical anion in water**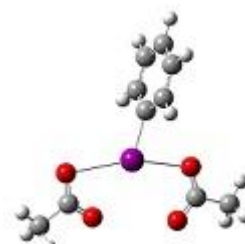

Gibbs Free Energy (hartrees):  
B3LYP/6-31+G(d,p) water = -700.033776

|   |             |             |             |
|---|-------------|-------------|-------------|
| I | -0.33622600 | -0.08921900 | -0.00340200 |
| C | 1.62234900  | -0.85577400 | 0.00008900  |
| C | 2.25922600  | -1.12748500 | 1.21801800  |
| C | 3.55514800  | -1.65178500 | 1.21468200  |
| C | 4.20832900  | -1.90948700 | 0.00446300  |
| C | 3.56343100  | -1.64153700 | -1.20796300 |
| C | 2.26757400  | -1.11711500 | -1.21570700 |
| O | 0.97171200  | 2.29014900  | 0.01287100  |
| O | -2.48848900 | -2.23338000 | -0.01755800 |
| C | 0.13353200  | 3.26472300  | 0.01585200  |
| C | -3.40732300 | -1.35691700 | -0.01278000 |
| O | -1.11167200 | 3.16717300  | 0.02026000  |
| O | -3.22036700 | -0.10436800 | -0.01449400 |
| C | 0.77322100  | 4.66110600  | -0.01089800 |
| C | -4.86049500 | -1.85180200 | 0.01736000  |
| H | 5.21413000  | -2.31871700 | 0.00617300  |
| H | 4.05084400  | -1.85884400 | 2.15856900  |
| H | 1.75590600  | -0.93082500 | 2.15903000  |
| H | 1.77072600  | -0.91241200 | -2.15844200 |
| H | 4.06555100  | -1.84064500 | -2.15016200 |
| H | -5.45678300 | -1.30891100 | -0.72230700 |
| H | -4.92679900 | -2.92554300 | -0.17066100 |
| H | -5.28817200 | -1.63916600 | 1.00391500  |
| H | 0.26009100  | 5.30981300  | 0.70421000  |
| H | 1.84061000  | 4.62775200  | 0.21371400  |
| H | 0.63443800  | 5.08593600  | -1.01107000 |

**[Bis(acetoxy)iodo]benzene radical anion in acetone**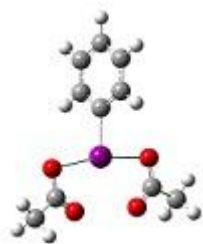

Gibbs Free Energy (hartrees):  
 B3LYP/6-31+G(d,p) acetone = -700.018444  
 Optimized geometry for BP86/6-31+G(d,p):

|   |             |             |             |
|---|-------------|-------------|-------------|
| I | -0.31082000 | -0.00380400 | 0.00275900  |
| C | 1.73444400  | -0.57222800 | 0.00084500  |
| C | 2.40608800  | -0.76828000 | 1.22400700  |
| C | 3.75817400  | -1.15413800 | 1.21634800  |
| C | 4.43537400  | -1.34613500 | -0.00211000 |
| C | 3.75644500  | -1.15089600 | -1.21909100 |
| C | 2.40436500  | -0.76500200 | -1.22378900 |
| O | 0.53733100  | 2.78823000  | 0.00080600  |
| O | -1.68785800 | -2.65504800 | -0.00946800 |
| C | -0.63404300 | 3.31278300  | 0.00018800  |
| C | -2.83835200 | -2.09167600 | -0.00974900 |
| O | -1.74356800 | 2.69627000  | 0.00310300  |
| O | -3.06370600 | -0.83799500 | -0.00132300 |
| C | -0.68524000 | 4.85939200  | -0.00530100 |
| C | -4.06707600 | -3.02742000 | 0.00028100  |
| H | 5.48779200  | -1.64772700 | -0.00326300 |
| H | 4.28040000  | -1.30458400 | 2.16713800  |
| H | 1.88292300  | -0.62053500 | 2.17364300  |
| H | 1.87983600  | -0.61472100 | -2.17227400 |
| H | 4.27730700  | -1.29881600 | -2.17102600 |
| H | -4.54523100 | -2.97461700 | 0.99390800  |
| H | -4.80460100 | -2.68390300 | -0.74322500 |
| H | -3.78543300 | -4.07080200 | -0.20506300 |
| H | 0.32081900  | 5.30366000  | -0.00336200 |
| H | -1.23613100 | 5.19849200  | -0.89865000 |
| H | -1.24289900 | 5.20511600  | 0.88122900  |

**[Bis(acetoxy)iodo]benzene radical anion in DCM**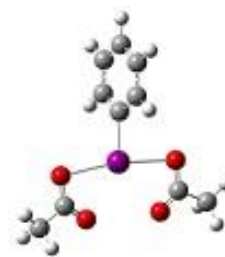

Gibbs Free Energy (hartrees):  
 B3LYP/6-31+G(d,p) DCM = -700.010684  
 Optimized geometry for BP86/6-31+G(d,p):

|   |             |             |             |
|---|-------------|-------------|-------------|
| I | -0.31648000 | 0.00643700  | 0.00798400  |
| C | 1.72719500  | -0.56952100 | 0.00213800  |
| C | 2.39358200  | -0.76899400 | -1.22328200 |
| C | 3.74472400  | -1.15789400 | -1.22237100 |
| C | 4.42813400  | -1.34931200 | -0.00739900 |
| C | 3.75539600  | -1.15054900 | 1.21234300  |
| C | 2.40424600  | -0.76171400 | 1.22284100  |
| O | -1.66549000 | -2.66144500 | -0.00825900 |
| O | 0.54185900  | 2.80070700  | -0.00409000 |
| C | -2.81846000 | -2.10414600 | -0.00979100 |
| C | -0.63598700 | 3.30902500  | -0.01622200 |
| O | -3.05485500 | -0.85306900 | 0.00449300  |
| O | -1.73844400 | 2.68040200  | -0.00872800 |
| C | -4.04152400 | -3.04924100 | -0.00666300 |
| C | -0.69826900 | 4.85626200  | -0.00759400 |
| H | 5.48010500  | -1.65291400 | -0.01111000 |
| H | 4.26167600  | -1.31086000 | -2.17579800 |
| H | 1.86568700  | -0.62116700 | -2.17030800 |
| H | 1.88476000  | -0.60820600 | 2.17360100  |
| H | 4.28075900  | -1.29773600 | 2.16207300  |
| H | -0.84895000 | 5.19293500  | 1.03321300  |
| H | 0.23561600  | 5.29874200  | -0.38591500 |
| H | -1.55472200 | 5.20536700  | -0.60534300 |
| H | -4.79745600 | -2.68678400 | -0.72201100 |
| H | -3.75518800 | -4.08293600 | -0.25158500 |
| H | -4.49766100 | -3.03385300 | 0.99868800  |

### Iodobenzene in water

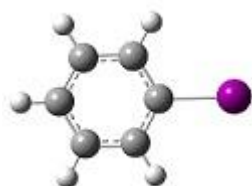

Gibbs Free Energy (hartrees):  
B3LYP/6-31+G(d,p) water = -243.020998

|   |             |             |             |
|---|-------------|-------------|-------------|
| I | -1.55656900 | 0.00000000  | -0.00000100 |
| C | 0.56265700  | 0.00000000  | -0.00001000 |
| C | 1.24942900  | -1.21666600 | 0.00000900  |
| C | 2.64930700  | -1.20913000 | 0.00000700  |
| C | 3.35124000  | 0.00000000  | -0.00002100 |
| C | 2.64930700  | 1.20913000  | 0.00000700  |
| C | 1.24943000  | 1.21666600  | 0.00000900  |
| H | 4.43702300  | 0.00000000  | -0.00003800 |
| H | 3.18516300  | -2.15392100 | 0.00001500  |
| H | 0.71128700  | -2.15836600 | 0.00003400  |
| H | 0.71128600  | 2.15836600  | 0.00003400  |
| H | 3.18516300  | 2.15392100  | 0.00001500  |

### Iodobenzene in acetone

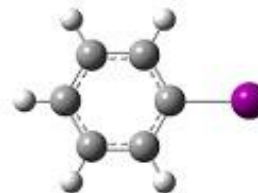

Gibbs Free Energy (hartrees):  
B3LYP/6-31+G(d,p) acetone = -243.020779

|   |             |             |             |
|---|-------------|-------------|-------------|
| I | 1.55646000  | 0.00000000  | 0.00000000  |
| C | -0.56246800 | 0.00000000  | -0.00000200 |
| C | -1.24935000 | 1.21655800  | 0.00000000  |
| C | -2.64915100 | 1.20906200  | 0.00000000  |
| C | -3.35108100 | 0.00000000  | 0.00000000  |
| C | -2.64915100 | -1.20906200 | 0.00000000  |
| C | -1.24935000 | -1.21655800 | 0.00000000  |
| H | -4.43687700 | 0.00000000  | 0.00000100  |
| H | -3.18507000 | 2.15382800  | 0.00000100  |
| H | -0.71102000 | 2.15815700  | 0.00000000  |
| H | -0.71102000 | -2.15815700 | 0.00000000  |
| H | -3.18507000 | -2.15382800 | 0.00000100  |

### Iodobenzene in DCM

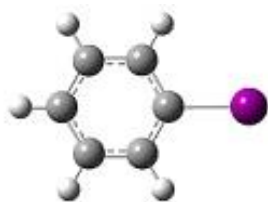

Gibbs Free Energy (hartrees):  
B3LYP/6-31+G(d,p) DCM = -243.020423

|   |             |             |             |
|---|-------------|-------------|-------------|
| I | -1.55633300 | 0.00000000  | -0.00000100 |
| C | 0.56220800  | 0.00000000  | -0.00001100 |
| C | 1.24927400  | -1.21638400 | 0.00000900  |
| C | 2.64896700  | -1.20893500 | 0.00000700  |
| C | 3.35092200  | 0.00000000  | -0.00002100 |
| C | 2.64896700  | 1.20893600  | 0.00000700  |
| C | 1.24927400  | 1.21638400  | 0.00000900  |
| H | 4.43673100  | 0.00000000  | -0.00003800 |
| H | 3.18491700  | -2.15370800 | 0.00001600  |
| H | 0.71070600  | -2.15784800 | 0.00003500  |
| H | 0.71070500  | 2.15784700  | 0.00003400  |
| H | 3.18491700  | 2.15370700  | 0.00001600  |

### Acetate anion in water

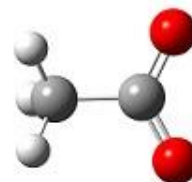

Gibbs Free Energy (hartrees):  
B3LYP/6-31+G(d,p) water = -228.627241

|   |             |             |             |
|---|-------------|-------------|-------------|
| O | -0.76389500 | -1.12843300 | 0.00200800  |
| C | -0.18539900 | 0.00000000  | -0.01063500 |
| O | -0.76387700 | 1.12844200  | 0.00200800  |
| C | 1.35378600  | -0.00000800 | -0.00435800 |
| H | 1.70295500  | 0.00001600  | 1.03592200  |
| H | 1.75444500  | -0.89460900 | -0.48902800 |
| H | 1.75444700  | 0.89457100  | -0.48906600 |



### Acetate anion in acetone

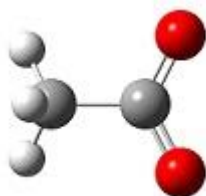

Gibbs Free Energy (hartrees):  
B3LYP/6-31+G(d,p) acetone = -228.623003

|   |             |             |             |
|---|-------------|-------------|-------------|
| O | 0.76329300  | 1.12891300  | 0.00202800  |
| C | 0.18663100  | 0.00000000  | -0.01069800 |
| O | 0.76330800  | -1.12890500 | 0.00202800  |
| C | -1.35362600 | -0.00000700 | -0.00438500 |
| H | -1.70257200 | 0.00004500  | 1.03603900  |
| H | -1.75413400 | 0.89478900  | -0.48903900 |
| H | -1.75413000 | -0.89485100 | -0.48895200 |

### Acetate anion in DCM

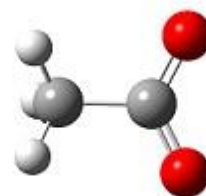

Gibbs Free Energy (hartrees):  
B3LYP/6-31+G(d,p) DCM = -228.615714

|   |             |             |             |
|---|-------------|-------------|-------------|
| O | -0.76234400 | -1.12971200 | 0.00206100  |
| C | -0.18870100 | 0.00000100  | -0.01080100 |
| O | -0.76233500 | 1.12971600  | 0.00206000  |
| C | 1.35339300  | -0.00000500 | -0.00443100 |
| H | 1.70196400  | 0.00003500  | 1.03624500  |
| H | 1.75365200  | -0.89523400 | -0.48888100 |
| H | 1.75366100  | 0.89519000  | -0.48894100 |

## 4-Nitroiodobenzene radical anion

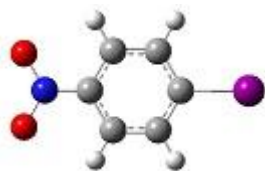

Gibbs Free Energy (hartrees):

B3LYP/6-31+G(d,p) MeCN = -447.665168

|   |            |             |             |
|---|------------|-------------|-------------|
| I | 0.00000000 | 0.00000000  | 2.55329500  |
| C | 0.00000000 | 0.00000000  | 0.43627600  |
| C | 0.00000000 | 1.21535100  | -0.26147500 |
| C | 0.00000000 | 1.22038100  | -1.65363900 |
| C | 0.00000000 | 0.00000000  | -2.37075700 |
| C | 0.00000000 | -1.22038100 | -1.65363900 |
| C | 0.00000000 | -1.21535100 | -0.26147500 |
| H | 0.00000000 | 2.15514100  | -2.19970700 |
| H | 0.00000000 | 2.15973700  | 0.27303200  |
| H | 0.00000000 | -2.15973700 | 0.27303200  |
| H | 0.00000000 | -2.15514100 | -2.19970700 |
| N | 0.00000000 | 0.00000000  | -3.76597000 |
| O | 0.00000000 | -1.13103000 | -4.40757600 |
| O | 0.00000000 | 1.13103000  | -4.40757600 |
